# Supplementary material for: Electron donor–acceptor properties of metal atoms interacting with pterins
Source: Royal Society of Chemistry journal article supplement (doi:10.1039/b9nj00805e), 2010-01-01
Supplement: b9nj00805e.pdf [file b9nj00805e.pdf]

Electronic Supplementary Information (ESI)

Table ESI-1. Vertical Ionization Energy (*VIE*) and Vertical Electron Affinities (*VEA*), for [metal-pterins] complexes in gas phase.

| WT/B3LYP/LAN2DZ/6-311G(d,p) | <i>VIE</i> (KJ) | <i>VEA</i> (KJ) |
|-----------------------------|-----------------|-----------------|
| Ptr-Cu                      | 509.77          | -15.65          |
| Ptr-Ag                      | 535.08          | 67.42           |
| Ptr-Au                      | 653.71          | 85.33           |
| Ptr-Zn                      | 750.80          | 5.50            |
| Ptr-Cd                      | 699.36          | 43.58           |
| Ptr-Hg                      | 745.03          | 24.41           |
| 7-Xap-Cu                    | 496.09          | 20.89           |
| 7-Xap-Ag                    | 547.02          | 52.15           |
| 7-Xap-Au                    | 653.03          | 76.95           |
| 7-Xap-Zn                    | 736.52          | 0.62            |
| 7-Xap-Cd                    | 698.46          | 27.32           |
| 7-Xap-Hg                    | 740.05          | 19.16           |
| Sep-Cu                      | 508.80          | 7.01            |
| Sep-Ag                      | 491.74          | 21.53           |
| Sep-Au                      | 590.08          | 91.25           |
| Sep-Zn                      | 672.79          | 23.22           |
| Sep-Cd                      | 621.41          | 61.53           |
| Sep-Hg                      | 665.42          | 43.57           |

Table ESI-2. Vertical Ionization Energy (*VIE*) and Vertical Electron Affinities (*VEA*), for [metal-pterins]<sup>+1</sup> complexes in water. Pterin, isoxanthropterin and sepiapterin are neutrals.

| WT/B3LYP/LAN2DZ/6-311G(d,p) | <i>VIE</i> (KJ) | <i>VEA</i> (KJ) |
|-----------------------------|-----------------|-----------------|
| Ptr-Cu                      | 545.77          | 279.99          |
| Ptr-Ag                      | 644.10          | 276.73          |
| Ptr-Au                      | 654.37          | 340.36          |
| Ptr-Zn                      | 273.43          | 223.19          |
| Ptr-Cd                      | 236.29          | 214.93          |
| Ptr-Hg                      | 275.41          | 227.01          |
| 7-Xap-Cu                    | 537.60          | 253.28          |
| 7-Xap-Ag                    | 625.86          | 224.76          |
| 7-Xap-Au                    | 638.91          | 340.77          |
| 7-Xap-Zn                    | 272.34          | 221.95          |
| 7-Xap-Cd                    | 235.34          | 195.25          |
| 7-Xap-Hg                    | 274.08          | 225.74          |
| Sep-Cu                      | 473.92          | 280.53          |
| Sep-Ag                      | 566.36          | 283.70          |

|                 |         |        |
|-----------------|---------|--------|
| Sep-Au          | 582.91  | 304.10 |
| Sep-Zn          | 270.18  | 246.60 |
| Sep-Cd          | 306.89  | 172.05 |
| Sep-Hg          | 278.51  | 231.48 |
| OH              | 1183.07 | 401.22 |
| Pterin          | 636.78  | 220.24 |
| isoxanthopterin | 609.64  | 195.90 |
| sepiapterin     | 552.28  | 222.83 |
| Cu              | 779.53  | 370.57 |
| Ag              | 936.80  | 343.58 |
| Au              | 893.97  | 513.19 |
| Zn              | 446.36  | 380.82 |
| Cd              | 359.73  | 321.82 |
| Hg              | 389.79  | 344.24 |

Table ESI-3. Vertical Ionization Energy (*VIE*) and Vertical Electron Affinities (*VEA*), for [metal-pterins]<sup>+2</sup> complexes in water

| WT/B3LYP/LAN2DZ/6-311G(d,p) | <i>VIE</i> (KJ) | <i>VEA</i> (KJ) |
|-----------------------------|-----------------|-----------------|
| Ptr-Cu                      | 818.66          | 497.08          |
| Ptr-Ag                      | 785.22          | 613.71          |
| Ptr-Au                      | 779.00          | 627.18          |
| Ptr-Zn                      | 685.05          | 226.88          |
| Ptr-Cd                      | 666.00          | 205.71          |
| Ptr-Hg                      | 653.56          | 243.84          |
| 7-Xap-Cu                    | 803.79          | 486.62          |
| 7-Xap-Ag                    | 768.07          | 589.88          |
| 7-Xap-Au                    | 778.06          | 607.63          |
| 7-Xap-Zn                    | 669.24          | 226.15          |
| 7-Xap-Cd                    | 650.93          | 206.47          |
| 7-Xap-Hg                    | 641.77          | 238.31          |
| Sep-Cu                      | 764.53          | 415.58          |
| Sep-Ag                      | 699.87          | 520.30          |
| Sep-Au                      | 709.78          | 536.63          |
| Sep-Zn                      | 617.38          | 348.43          |
| Sep-Cd                      | 595.51          | 330.07          |
| Sep-Hg                      | 589.40          | 318.05          |

## OPTIMIZED GEOMETRIES

[Ptr-Cu]

Input orientation:

-----  
 Center Atomic Atomic Coordinates (Angstroms)  
 Number Number Type X Y Z

|    |    |   |           |           |           |
|----|----|---|-----------|-----------|-----------|
| 1  | 6  | 0 | 0.033448  | -0.055398 | 0.028420  |
| 2  | 6  | 0 | 0.032615  | -0.023388 | 2.328882  |
| 3  | 6  | 0 | 1.462114  | 0.006859  | 2.343973  |
| 4  | 6  | 0 | 2.196114  | -0.005010 | 1.126226  |
| 5  | 8  | 0 | 3.458036  | -0.004788 | 0.989392  |
| 6  | 6  | 0 | 0.025662  | 0.000592  | 4.610935  |
| 7  | 6  | 0 | 1.398505  | 0.031309  | 4.673075  |
| 8  | 1  | 0 | -0.555551 | -0.001300 | 5.526865  |
| 9  | 7  | 0 | 2.160459  | 0.035579  | 3.552052  |
| 10 | 7  | 0 | -0.687210 | -0.027295 | 3.443550  |
| 11 | 7  | 0 | -0.651382 | -0.037192 | 1.126978  |
| 12 | 7  | 0 | 1.404764  | -0.032686 | -0.028029 |
| 13 | 7  | 0 | -0.618048 | -0.149054 | -1.184314 |
| 14 | 1  | 0 | -1.614276 | -0.013433 | -1.087334 |
| 15 | 1  | 0 | -0.211044 | 0.346763  | -1.964172 |
| 16 | 1  | 0 | 1.901534  | -0.151966 | -0.899406 |
| 17 | 1  | 0 | 1.922375  | 0.054218  | 5.621269  |
| 18 | 29 | 0 | 3.957226  | 0.023142  | 3.020190  |

[Ptr-Cu]<sup>+1</sup>

Input orientation:

| Center Number | Atomic Number | Atomic Type | Coordinates (Angstroms) |           |           |
|---------------|---------------|-------------|-------------------------|-----------|-----------|
|               |               |             | X                       | Y         | Z         |
| 1             | 6             | 0           | 0.012535                | -0.000313 | 0.028902  |
| 2             | 6             | 0           | 0.028781                | -0.000006 | 2.309961  |
| 3             | 6             | 0           | 1.440191                | -0.000099 | 2.348313  |
| 4             | 6             | 0           | 2.200104                | -0.000292 | 1.099627  |
| 5             | 8             | 0           | 3.430142                | -0.000467 | 1.026803  |
| 6             | 6             | 0           | 0.017399                | 0.000042  | 4.590891  |
| 7             | 6             | 0           | 1.431384                | 0.000101  | 4.639656  |
| 8             | 1             | 0           | -0.545755               | 0.000231  | 5.519521  |
| 9             | 7             | 0           | 2.131353                | 0.000012  | 3.512486  |
| 10            | 7             | 0           | -0.673940               | 0.000026  | 3.472276  |
| 11            | 7             | 0           | -0.663279               | -0.000158 | 1.149657  |
| 12            | 7             | 0           | 1.402248                | -0.000334 | -0.022763 |
| 13            | 7             | 0           | -0.640126               | -0.000380 | -1.142127 |
| 14            | 1             | 0           | -1.648422               | -0.000325 | -1.109685 |
| 15            | 1             | 0           | -0.182286               | -0.000386 | -2.038181 |
| 16            | 1             | 0           | 1.893798                | -0.000444 | -0.909913 |
| 17            | 1             | 0           | 1.968412                | 0.000220  | 5.578747  |
| 18            | 29            | 0           | 4.012803                | -0.000478 | 3.174382  |

[Ptr-Cu]<sup>+2</sup>

Input orientation:

| Center Number | Atomic Number | Atomic Type | Coordinates (Angstroms) |           |          |
|---------------|---------------|-------------|-------------------------|-----------|----------|
|               |               |             | X                       | Y         | Z        |
| 1             | 6             | 0           | 0.029571                | -0.010753 | 0.015936 |
| 2             | 6             | 0           | -0.001455               | 0.040231  | 2.314379 |
| 3             | 6             | 0           | 1.413338                | 0.071816  | 2.347943 |
| 4             | 6             | 0           | 2.164690                | 0.005902  | 1.123507 |

|    |    |   |           |           |           |
|----|----|---|-----------|-----------|-----------|
| 5  | 8  | 0 | 3.423335  | 0.000122  | 1.124481  |
| 6  | 6  | 0 | -0.002545 | -0.042699 | 4.596778  |
| 7  | 6  | 0 | 1.438337  | 0.008847  | 4.639955  |
| 8  | 1  | 0 | -0.549547 | -0.077439 | 5.535891  |
| 9  | 7  | 0 | 2.114559  | 0.036492  | 3.507989  |
| 10 | 7  | 0 | -0.690015 | -0.009064 | 3.489585  |
| 11 | 7  | 0 | -0.653927 | -0.013868 | 1.152877  |
| 12 | 7  | 0 | 1.430798  | -0.043979 | -0.014658 |
| 13 | 7  | 0 | -0.622336 | 0.012823  | -1.133759 |
| 14 | 1  | 0 | -1.636547 | 0.035894  | -1.101996 |
| 15 | 1  | 0 | -0.176843 | 0.029334  | -2.042130 |
| 16 | 1  | 0 | 1.939438  | -0.085920 | -0.896658 |
| 17 | 1  | 0 | 1.967949  | 0.061762  | 5.584192  |
| 18 | 29 | 0 | 4.026542  | -0.022549 | 2.984241  |

Ptr-Ag

Input orientation:

| Center<br>Number | Atomic<br>Number | Atomic<br>Type | Coordinates (Angstroms) |           |           |
|------------------|------------------|----------------|-------------------------|-----------|-----------|
|                  |                  |                | X                       | Y         | Z         |
| 1                | 6                | 0              | 3.043338                | -0.866132 | -0.112942 |
| 2                | 6                | 0              | 1.835605                | 1.071464  | -0.039596 |
| 3                | 6                | 0              | 0.630913                | 0.374687  | 0.239160  |
| 4                | 6                | 0              | 0.647869                | -1.080515 | 0.353516  |
| 5                | 8                | 0              | -0.310307               | -1.810284 | 0.560344  |
| 6                | 6                | 0              | 0.663935                | 3.019405  | 0.018690  |
| 7                | 6                | 0              | -0.531073               | 2.333743  | 0.253091  |
| 8                | 1                | 0              | 0.663825                | 4.104297  | -0.039422 |
| 9                | 7                | 0              | -0.554189               | 1.005754  | 0.371306  |
| 10               | 7                | 0              | 1.839424                | 2.413807  | -0.138603 |
| 11               | 7                | 0              | 3.033157                | 0.427673  | -0.220987 |
| 12               | 7                | 0              | 1.925731                | -1.622980 | 0.158144  |
| 13               | 7                | 0              | 4.224563                | -1.546404 | -0.224772 |
| 14               | 1                | 0              | 4.988591                | -0.979581 | -0.560972 |
| 15               | 1                | 0              | 4.213807                | -2.501576 | -0.546662 |
| 16               | 1                | 0              | 1.988813                | -2.625799 | 0.278073  |
| 17               | 1                | 0              | -1.474225               | 2.859701  | 0.350367  |
| 18               | 47               | 0              | -2.530270               | -0.430545 | -0.167048 |

[Ptr-Ag]<sup>+1</sup>

Input orientation:

| Center<br>Number | Atomic<br>Number | Atomic<br>Type | Coordinates (Angstroms) |           |          |
|------------------|------------------|----------------|-------------------------|-----------|----------|
|                  |                  |                | X                       | Y         | Z        |
| 1                | 6                | 0              | -0.003083               | -0.000216 | 0.028775 |
| 2                | 6                | 0              | 0.010766                | 0.000706  | 2.308302 |
| 3                | 6                | 0              | 1.426509                | 0.000343  | 2.358610 |
| 4                | 6                | 0              | 2.182354                | 0.000240  | 1.108657 |
| 5                | 8                | 0              | 3.412292                | -0.000632 | 1.006818 |
| 6                | 6                | 0              | -0.022340               | 0.000165  | 4.588410 |
| 7                | 6                | 0              | 1.392758                | -0.000080 | 4.643856 |
| 8                | 1                | 0              | -0.593626               | -0.000139 | 5.512212 |
| 9                | 7                | 0              | 2.100634                | -0.000069 | 3.526571 |

|    |    |   |           |           |           |
|----|----|---|-----------|-----------|-----------|
| 10 | 7  | 0 | -0.701672 | 0.000398  | 3.463902  |
| 11 | 7  | 0 | -0.680408 | 0.000270  | 1.146905  |
| 12 | 7  | 0 | 1.385648  | -0.000226 | -0.014747 |
| 13 | 7  | 0 | -0.650857 | -0.000642 | -1.145584 |
| 14 | 1  | 0 | -1.659200 | -0.000676 | -1.117040 |
| 15 | 1  | 0 | -0.189410 | -0.000870 | -2.039668 |
| 16 | 1  | 0 | 1.881846  | -0.000687 | -0.899393 |
| 17 | 1  | 0 | 1.917862  | -0.000587 | 5.590582  |
| 18 | 47 | 0 | 4.405269  | -0.000348 | 3.161386  |

[Ptr-Ag]<sup>+2</sup>

Input orientation:

| Center<br>Number | Atomic<br>Number | Atomic<br>Type | Coordinates (Angstroms) |           |           |
|------------------|------------------|----------------|-------------------------|-----------|-----------|
|                  |                  |                | X                       | Y         | Z         |
| 1                | 6                | 0              | 0.044185                | -0.000314 | -0.009284 |
| 2                | 6                | 0              | 0.004225                | -0.000043 | 2.308962  |
| 3                | 6                | 0              | 1.433403                | -0.000192 | 2.358758  |
| 4                | 6                | 0              | 2.204131                | -0.000325 | 1.091186  |
| 5                | 8                | 0              | 3.415813                | -0.000354 | 1.027876  |
| 6                | 6                | 0              | -0.065957               | 0.000154  | 4.578167  |
| 7                | 6                | 0              | 1.368201                | -0.000007 | 4.627151  |
| 8                | 1                | 0              | -0.633495               | 0.000383  | 5.504708  |
| 9                | 7                | 0              | 2.104174                | -0.000179 | 3.514828  |
| 10               | 7                | 0              | -0.733569               | 0.000145  | 3.453608  |
| 11               | 7                | 0              | -0.660001               | -0.000106 | 1.151733  |
| 12               | 7                | 0              | 1.411145                | -0.000418 | -0.053664 |
| 13               | 7                | 0              | -0.672135               | -0.000370 | -1.113589 |
| 14               | 1                | 0              | -1.685867               | -0.000247 | -1.019058 |
| 15               | 1                | 0              | -0.280419               | -0.000508 | -2.050465 |
| 16               | 1                | 0              | 1.914527                | -0.000449 | -0.939691 |
| 17               | 1                | 0              | 1.884569                | 0.000001  | 5.580932  |
| 18               | 47               | 0              | 4.562412                | -0.000219 | 3.216398  |

[Ptr-Au]

Input orientation:

| Center<br>Number | Atomic<br>Number | Atomic<br>Type | Coordinates (Angstroms) |           |           |
|------------------|------------------|----------------|-------------------------|-----------|-----------|
|                  |                  |                | X                       | Y         | Z         |
| 1                | 6                | 0              | -0.041858               | -0.035337 | 0.008650  |
| 2                | 6                | 0              | 0.019179                | -0.018275 | 2.287599  |
| 3                | 6                | 0              | 1.439006                | -0.014788 | 2.318446  |
| 4                | 6                | 0              | 2.189950                | -0.036565 | 1.046828  |
| 5                | 8                | 0              | 3.389499                | -0.053309 | 0.897570  |
| 6                | 6                | 0              | 0.013662                | -0.003139 | 4.563507  |
| 7                | 6                | 0              | 1.418093                | 0.006819  | 4.596739  |
| 8                | 1                | 0              | -0.550790               | -0.001574 | 5.492155  |
| 9                | 7                | 0              | 2.118482                | -0.000830 | 3.472039  |
| 10               | 7                | 0              | -0.683169               | -0.014241 | 3.441565  |
| 11               | 7                | 0              | -0.703976               | -0.016445 | 1.127558  |
| 12               | 7                | 0              | 1.331656                | -0.045570 | -0.067008 |
| 13               | 7                | 0              | -0.718264               | -0.090085 | -1.173080 |
| 14               | 1                | 0              | -1.713802               | 0.049719  | -1.092585 |

|    |    |   |           |           |           |
|----|----|---|-----------|-----------|-----------|
| 15 | 1  | 0 | -0.283970 | 0.241303  | -2.019336 |
| 16 | 1  | 0 | 1.804794  | -0.111349 | -0.959654 |
| 17 | 1  | 0 | 1.968955  | 0.021093  | 5.529589  |
| 18 | 79 | 0 | 4.617895  | 0.119525  | 3.757973  |

[Ptr-Au]<sup>+1</sup>

Input orientation:

| Center<br>Number | Atomic<br>Number | Atomic<br>Type | Coordinates (Angstroms) |           |           |
|------------------|------------------|----------------|-------------------------|-----------|-----------|
|                  |                  |                | X                       | Y         | Z         |
| 1                | 6                | 0              | -0.004075               | -0.000199 | 0.016417  |
| 2                | 6                | 0              | 0.028788                | 0.000186  | 2.297320  |
| 3                | 6                | 0              | 1.448490                | 0.000037  | 2.332194  |
| 4                | 6                | 0              | 2.198732                | -0.000051 | 1.070978  |
| 5                | 8                | 0              | 3.417971                | -0.000444 | 0.963604  |
| 6                | 6                | 0              | 0.007097                | 0.000199  | 4.580119  |
| 7                | 6                | 0              | 1.419889                | -0.000054 | 4.636430  |
| 8                | 1                | 0              | -0.557558               | 0.000141  | 5.507793  |
| 9                | 7                | 0              | 2.112402                | -0.000102 | 3.504153  |
| 10               | 7                | 0              | -0.674328               | 0.000226  | 3.458604  |
| 11               | 7                | 0              | -0.669144               | 0.000020  | 1.145074  |
| 12               | 7                | 0              | 1.380492                | -0.000270 | -0.042891 |
| 13               | 7                | 0              | -0.670262               | -0.000486 | -1.145037 |
| 14               | 1                | 0              | -1.678371               | -0.000471 | -1.100509 |
| 15               | 1                | 0              | -0.223353               | -0.000711 | -2.046874 |
| 16               | 1                | 0              | 1.866447                | -0.000500 | -0.933242 |
| 17               | 1                | 0              | 1.954155                | -0.000176 | 5.575224  |
| 18               | 79               | 0              | 4.257970                | -0.000394 | 3.409197  |

[Ptr-Au]<sup>+2</sup>

Input orientation:

| Center<br>Number | Atomic<br>Number | Atomic<br>Type | Coordinates (Angstroms) |           |           |
|------------------|------------------|----------------|-------------------------|-----------|-----------|
|                  |                  |                | X                       | Y         | Z         |
| 1                | 6                | 0              | 0.043340                | -0.000227 | -0.026598 |
| 2                | 6                | 0              | 0.038445                | 0.000271  | 2.298917  |
| 3                | 6                | 0              | 1.467509                | 0.000076  | 2.327862  |
| 4                | 6                | 0              | 2.223951                | -0.000197 | 1.045821  |
| 5                | 8                | 0              | 3.426753                | -0.000705 | 0.963780  |
| 6                | 6                | 0              | -0.023445               | 0.000168  | 4.570371  |
| 7                | 6                | 0              | 1.406212                | -0.000200 | 4.618079  |
| 8                | 1                | 0              | -0.585594               | 0.000145  | 5.500293  |
| 9                | 7                | 0              | 2.131826                | -0.000143 | 3.494044  |
| 10               | 7                | 0              | -0.692270               | 0.000408  | 3.447069  |
| 11               | 7                | 0              | -0.641894               | 0.000025  | 1.149777  |
| 12               | 7                | 0              | 1.404093                | -0.000361 | -0.088214 |
| 13               | 7                | 0              | -0.697523               | -0.000447 | -1.114028 |
| 14               | 1                | 0              | -1.709326               | -0.000397 | -0.998495 |
| 15               | 1                | 0              | -0.325679               | -0.000687 | -2.059438 |
| 16               | 1                | 0              | 1.897353                | -0.000494 | -0.980280 |
| 17               | 1                | 0              | 1.929347                | -0.000403 | 5.566568  |
| 18               | 79               | 0              | 4.322242                | 0.000119  | 3.513028  |

-----  
[Ptr-Zn]

Input orientation:

| Center<br>Number | Atomic<br>Number | Atomic<br>Type | Coordinates (Angstroms) |           |           |
|------------------|------------------|----------------|-------------------------|-----------|-----------|
|                  |                  |                | X                       | Y         | Z         |
| 1                | 6                | 0              | -0.128408               | -0.005270 | -0.014027 |
| 2                | 6                | 0              | -0.131212               | -0.015245 | 2.265393  |
| 3                | 6                | 0              | 1.278072                | 0.137500  | 2.339044  |
| 4                | 6                | 0              | 2.061657                | 0.240665  | 1.090011  |
| 5                | 8                | 0              | 3.255180                | 0.388356  | 0.974085  |
| 6                | 6                | 0              | -0.193273               | -0.030927 | 4.538254  |
| 7                | 6                | 0              | 1.202613                | 0.116854  | 4.600192  |
| 8                | 1                | 0              | -0.779053               | -0.096255 | 5.451988  |
| 9                | 7                | 0              | 1.936499                | 0.202116  | 3.501470  |
| 10               | 7                | 0              | -0.860665               | -0.097537 | 3.398358  |
| 11               | 7                | 0              | -0.818657               | -0.098657 | 1.081819  |
| 12               | 7                | 0              | 1.236888                | 0.156596  | -0.051188 |
| 13               | 7                | 0              | -0.771600               | -0.020602 | -1.221644 |
| 14               | 1                | 0              | -1.744195               | -0.281755 | -1.159697 |
| 15               | 1                | 0              | -0.279536               | -0.356640 | -2.034636 |
| 16               | 1                | 0              | 1.721589                | 0.281467  | -0.930936 |
| 17               | 1                | 0              | 1.719258                | 0.166259  | 5.553583  |
| 18               | 30               | 0              | 6.910186                | -0.689975 | 3.846484  |

-----  
[Ptr-Zn]<sup>+1</sup>

Input orientation:

| Center<br>Number | Atomic<br>Number | Atomic<br>Type | Coordinates (Angstroms) |           |           |
|------------------|------------------|----------------|-------------------------|-----------|-----------|
|                  |                  |                | X                       | Y         | Z         |
| 1                | 6                | 0              | 0.004337                | -0.000270 | 0.030448  |
| 2                | 6                | 0              | 0.003210                | -0.000154 | 2.310600  |
| 3                | 6                | 0              | 1.414004                | -0.000206 | 2.356680  |
| 4                | 6                | 0              | 2.176113                | -0.000368 | 1.120446  |
| 5                | 8                | 0              | 3.411629                | -0.000397 | 1.069854  |
| 6                | 6                | 0              | -0.007112               | 0.000168  | 4.591911  |
| 7                | 6                | 0              | 1.410876                | 0.000058  | 4.637338  |
| 8                | 1                | 0              | -0.570943               | 0.000323  | 5.520193  |
| 9                | 7                | 0              | 2.105090                | -0.000115 | 3.512776  |
| 10               | 7                | 0              | -0.698216               | 0.000070  | 3.473295  |
| 11               | 7                | 0              | -0.680515               | -0.000167 | 1.145627  |
| 12               | 7                | 0              | 1.397667                | -0.000371 | -0.009216 |
| 13               | 7                | 0              | -0.636026               | -0.000353 | -1.146398 |
| 14               | 1                | 0              | -1.644788               | -0.000273 | -1.124086 |
| 15               | 1                | 0              | -0.169855               | -0.000410 | -2.038316 |
| 16               | 1                | 0              | 1.897225                | -0.000434 | -0.892289 |
| 17               | 1                | 0              | 1.948010                | 0.000118  | 5.577956  |
| 18               | 30               | 0              | 4.254633                | -0.000268 | 3.091736  |

-----  
[Ptr-Zn]<sup>+2</sup>

Input orientation:

| Center<br>Number | Atomic<br>Number | Atomic<br>Type | Coordinates (Angstroms) |           |           |
|------------------|------------------|----------------|-------------------------|-----------|-----------|
|                  |                  |                | X                       | Y         | Z         |
| 1                | 6                | 0              | 0.021884                | -0.000315 | 0.022500  |
| 2                | 6                | 0              | 0.010946                | -0.000050 | 2.308441  |
| 3                | 6                | 0              | 1.428221                | -0.000151 | 2.354775  |
| 4                | 6                | 0              | 2.166417                | -0.000315 | 1.123137  |
| 5                | 8                | 0              | 3.440860                | -0.000408 | 1.082953  |
| 6                | 6                | 0              | -0.008724               | 0.000144  | 4.598643  |
| 7                | 6                | 0              | 1.427875                | 0.000049  | 4.662711  |
| 8                | 1                | 0              | -0.568371               | 0.000263  | 5.530733  |
| 9                | 7                | 0              | 2.112863                | -0.000096 | 3.535512  |
| 10               | 7                | 0              | -0.685273               | 0.000089  | 3.484001  |
| 11               | 7                | 0              | -0.654322               | -0.000140 | 1.156364  |
| 12               | 7                | 0              | 1.427475                | -0.000390 | -0.005436 |
| 13               | 7                | 0              | -0.617691               | -0.000350 | -1.136156 |
| 14               | 1                | 0              | -1.631105               | -0.000262 | -1.112446 |
| 15               | 1                | 0              | -0.165267               | -0.000432 | -2.039467 |
| 16               | 1                | 0              | 1.935333                | -0.000508 | -0.888257 |
| 17               | 1                | 0              | 1.951125                | 0.000093  | 5.610509  |
| 18               | 30               | 0              | 4.023095                | -0.000270 | 2.940037  |

[Ptr-Cd]

Input orientation:

| Center<br>Number | Atomic<br>Number | Atomic<br>Type | Coordinates (Angstroms) |           |           |
|------------------|------------------|----------------|-------------------------|-----------|-----------|
|                  |                  |                | X                       | Y         | Z         |
| 1                | 6                | 0              | -0.055540               | 0.046040  | 0.019815  |
| 2                | 6                | 0              | -0.055439               | 0.031843  | 2.299112  |
| 3                | 6                | 0              | 1.361178                | 0.071628  | 2.369063  |
| 4                | 6                | 0              | 2.145003                | 0.115692  | 1.119921  |
| 5                | 8                | 0              | 3.349685                | 0.167967  | 1.003288  |
| 6                | 6                | 0              | -0.111871               | 0.012955  | 4.572386  |
| 7                | 6                | 0              | 1.292572                | 0.045049  | 4.631772  |
| 8                | 1                | 0              | -0.698080               | -0.006810 | 5.487779  |
| 9                | 7                | 0              | 2.025552                | 0.076810  | 3.530351  |
| 10               | 7                | 0              | -0.785498               | 0.005345  | 3.434837  |
| 11               | 7                | 0              | -0.748604               | 0.006867  | 1.117511  |
| 12               | 7                | 0              | 1.319679                | 0.098612  | -0.018659 |
| 13               | 7                | 0              | -0.698185               | 0.082869  | -1.185406 |
| 14               | 1                | 0              | -1.689498               | -0.094875 | -1.126905 |
| 15               | 1                | 0              | -0.233539               | -0.273787 | -2.005457 |
| 16               | 1                | 0              | 1.812921                | 0.182485  | -0.898710 |
| 17               | 1                | 0              | 1.815075                | 0.045421  | 5.582974  |
| 18               | 48               | 0              | 5.569929                | -0.617161 | 3.294881  |

[Ptr-Cd]<sup>+1</sup>

Input orientation:

| Center<br>Number | Atomic<br>Number | Atomic<br>Type | Coordinates (Angstroms) |           |          |
|------------------|------------------|----------------|-------------------------|-----------|----------|
|                  |                  |                | X                       | Y         | Z        |
| 1                | 6                | 0              | -0.009270               | -0.000199 | 0.029478 |
| 2                | 6                | 0              | -0.007826               | 0.000018  | 2.309078 |



|    |    |   |           |           |           |
|----|----|---|-----------|-----------|-----------|
| 3  | 6  | 0 | 1.405789  | -0.000082 | 2.361641  |
| 4  | 6  | 0 | 2.162992  | -0.000196 | 1.122690  |
| 5  | 8  | 0 | 3.401015  | -0.000310 | 1.042741  |
| 6  | 6  | 0 | -0.035681 | 0.000236  | 4.589110  |
| 7  | 6  | 0 | 1.382418  | -0.000089 | 4.642018  |
| 8  | 1  | 0 | -0.605089 | 0.000235  | 5.514033  |
| 9  | 7  | 0 | 2.086770  | -0.000151 | 3.524723  |
| 10 | 7  | 0 | -0.718240 | 0.000270  | 3.466386  |
| 11 | 7  | 0 | -0.692550 | -0.000032 | 1.144177  |
| 12 | 7  | 0 | 1.383166  | -0.000393 | -0.006146 |
| 13 | 7  | 0 | -0.647944 | -0.000437 | -1.148915 |
| 14 | 1  | 0 | -1.656677 | -0.000341 | -1.128015 |
| 15 | 1  | 0 | -0.180544 | -0.000602 | -2.040082 |
| 16 | 1  | 0 | 1.884967  | -0.000569 | -0.887986 |
| 17 | 1  | 0 | 1.911307  | -0.000154 | 5.587431  |
| 18 | 48 | 0 | 4.550736  | -0.000255 | 3.106194  |

[Ptr-Cd]<sup>+2</sup>

Input orientation:

| Center<br>Number | Atomic<br>Number | Atomic<br>Type | Coordinates (Angstroms) |           |           |
|------------------|------------------|----------------|-------------------------|-----------|-----------|
|                  |                  |                | X                       | Y         | Z         |
| 1                | 6                | 0              | 0.007528                | -0.000354 | 0.019826  |
| 2                | 6                | 0              | 0.003580                | 0.000028  | 2.304621  |
| 3                | 6                | 0              | 1.426528                | -0.000101 | 2.356184  |
| 4                | 6                | 0              | 2.161374                | -0.000284 | 1.118942  |
| 5                | 8                | 0              | 3.426790                | -0.000466 | 1.041132  |
| 6                | 6                | 0              | -0.032082               | 0.000094  | 4.593218  |
| 7                | 6                | 0              | 1.401447                | 0.000078  | 4.660453  |
| 8                | 1                | 0              | -0.597444               | 0.000185  | 5.521911  |
| 9                | 7                | 0              | 2.096974                | -0.000050 | 3.539520  |
| 10               | 7                | 0              | -0.699539               | 0.000064  | 3.473934  |
| 11               | 7                | 0              | -0.665377               | -0.000119 | 1.153381  |
| 12               | 7                | 0              | 1.408209                | -0.000415 | -0.007256 |
| 13               | 7                | 0              | -0.635814               | -0.000353 | -1.138906 |
| 14               | 1                | 0              | -1.648635               | -0.000238 | -1.112500 |
| 15               | 1                | 0              | -0.184901               | -0.000399 | -2.042446 |
| 16               | 1                | 0              | 1.914835                | -0.000578 | -0.890066 |
| 17               | 1                | 0              | 1.915719                | 0.000153  | 5.612877  |
| 18               | 48               | 0              | 4.316148                | -0.000293 | 3.023730  |

[Ptr-Hg]

Input orientation:

| Center<br>Number | Atomic<br>Number | Atomic<br>Type | Coordinates (Angstroms) |           |          |
|------------------|------------------|----------------|-------------------------|-----------|----------|
|                  |                  |                | X                       | Y         | Z        |
| 1                | 6                | 0              | -0.077634               | -0.000245 | 0.012340 |
| 2                | 6                | 0              | -0.062724               | 0.000145  | 2.291769 |
| 3                | 6                | 0              | 1.356122                | -0.000886 | 2.354163 |
| 4                | 6                | 0              | 2.133674                | -0.001407 | 1.099410 |
| 5                | 8                | 0              | 3.337192                | -0.002426 | 0.970898 |
| 6                | 6                | 0              | -0.105753               | 0.000385  | 4.566303 |
| 7                | 6                | 0              | 1.299055                | -0.000746 | 4.617554 |
| 8                | 1                | 0              | -0.686923               | 0.000652  | 5.485293 |

|    |    |   |           |           |           |
|----|----|---|-----------|-----------|-----------|
| 9  | 7  | 0 | 2.026096  | -0.001361 | 3.511652  |
| 10 | 7  | 0 | -0.786125 | 0.000739  | 3.432907  |
| 11 | 7  | 0 | -0.764319 | 0.000466  | 1.117027  |
| 12 | 7  | 0 | 1.298818  | -0.001197 | -0.034835 |
| 13 | 7  | 0 | -0.729479 | -0.000335 | -1.177362 |
| 14 | 1  | 0 | -1.734928 | 0.001070  | -1.148757 |
| 15 | 1  | 0 | -0.257914 | 0.000448  | -2.063572 |
| 16 | 1  | 0 | 1.793965  | -0.001845 | -0.917605 |
| 17 | 1  | 0 | 1.826949  | -0.001188 | 5.565889  |
| 18 | 80 | 0 | 5.749268  | 0.004681  | 3.545479  |

[Ptr-Hg]<sup>+1</sup>

Input orientation:

| Center<br>Number | Atomic<br>Number | Atomic<br>Type | Coordinates (Angstroms) |           |           |
|------------------|------------------|----------------|-------------------------|-----------|-----------|
|                  |                  |                | X                       | Y         | Z         |
| 1                | 6                | 0              | -0.015371               | -0.000271 | 0.026196  |
| 2                | 6                | 0              | -0.006108               | -0.000422 | 2.305264  |
| 3                | 6                | 0              | 1.411976                | -0.000370 | 2.359374  |
| 4                | 6                | 0              | 2.167798                | -0.000641 | 1.111142  |
| 5                | 8                | 0              | 3.398421                | -0.000429 | 1.006873  |
| 6                | 6                | 0              | -0.041812               | 0.000173  | 4.586573  |
| 7                | 6                | 0              | 1.374711                | 0.000114  | 4.643655  |
| 8                | 1                | 0              | -0.615256               | 0.000443  | 5.509123  |
| 9                | 7                | 0              | 2.077800                | -0.000110 | 3.526519  |
| 10               | 7                | 0              | -0.717807               | -0.000024 | 3.460565  |
| 11               | 7                | 0              | -0.694735               | -0.000277 | 1.143216  |
| 12               | 7                | 0              | 1.373501                | -0.000472 | -0.013191 |
| 13               | 7                | 0              | -0.660028               | -0.000212 | -1.149402 |
| 14               | 1                | 0              | -1.668543               | -0.000079 | -1.123299 |
| 15               | 1                | 0              | -0.196452               | -0.000244 | -2.042486 |
| 16               | 1                | 0              | 1.871730                | -0.000439 | -0.896779 |
| 17               | 1                | 0              | 1.901680                | 0.000312  | 5.589872  |
| 18               | 80               | 0              | 4.653836                | -0.000100 | 3.185337  |

[Ptr-Hg]<sup>+2</sup>

Input orientation:

| Center<br>Number | Atomic<br>Number | Atomic<br>Type | Coordinates (Angstroms) |           |           |
|------------------|------------------|----------------|-------------------------|-----------|-----------|
|                  |                  |                | X                       | Y         | Z         |
| 1                | 6                | 0              | 0.003283                | -0.000111 | 0.009819  |
| 2                | 6                | 0              | -0.004509               | -0.000198 | 2.297656  |
| 3                | 6                | 0              | 1.430802                | -0.000233 | 2.355985  |
| 4                | 6                | 0              | 2.166119                | -0.000438 | 1.104711  |
| 5                | 8                | 0              | 3.415642                | -0.000467 | 1.014403  |
| 6                | 6                | 0              | -0.038891               | 0.000172  | 4.592991  |
| 7                | 6                | 0              | 1.398480                | 0.000051  | 4.663896  |
| 8                | 1                | 0              | -0.605063               | 0.000307  | 5.522590  |
| 9                | 7                | 0              | 2.072682                | -0.000115 | 3.536372  |
| 10               | 7                | 0              | -0.691267               | 0.000078  | 3.471855  |
| 11               | 7                | 0              | -0.665792               | -0.000125 | 1.148194  |
| 12               | 7                | 0              | 1.397468                | -0.000346 | -0.018149 |
| 13               | 7                | 0              | -0.648381               | -0.000285 | -1.142284 |

|    |    |   |           |           |           |
|----|----|---|-----------|-----------|-----------|
| 14 | 1  | 0 | -1.661398 | -0.000324 | -1.110551 |
| 15 | 1  | 0 | -0.202811 | -0.000450 | -2.048984 |
| 16 | 1  | 0 | 1.901006  | -0.000516 | -0.902514 |
| 17 | 1  | 0 | 1.911615  | 0.000145  | 5.616376  |
| 18 | 80 | 0 | 4.436356  | -0.000194 | 3.116188  |

[7-Xap-Cu]

Input orientation:

| Center<br>Number | Atomic<br>Number | Atomic<br>Type | Coordinates (Angstroms) |           |           |
|------------------|------------------|----------------|-------------------------|-----------|-----------|
|                  |                  |                | X                       | Y         | Z         |
| 1                | 6                | 0              | 0.005981                | -0.047879 | 0.013613  |
| 2                | 6                | 0              | 0.042172                | -0.049799 | 2.284533  |
| 3                | 6                | 0              | 1.431971                | 0.034148  | 2.356139  |
| 4                | 6                | 0              | 2.184773                | 0.065892  | 1.132394  |
| 5                | 8                | 0              | 3.406202                | 0.089823  | 1.010409  |
| 6                | 6                | 0              | -0.056428               | 0.009852  | 4.740592  |
| 7                | 6                | 0              | 1.373131                | 0.110426  | 4.699177  |
| 8                | 7                | 0              | 2.103962                | 0.121932  | 3.564121  |
| 9                | 7                | 0              | -0.657018               | -0.103292 | 3.451095  |
| 10               | 7                | 0              | -0.675487               | -0.067866 | 1.129012  |
| 11               | 7                | 0              | 1.367669                | 0.000368  | -0.020422 |
| 12               | 7                | 0              | -0.655731               | -0.127002 | -1.184307 |
| 13               | 1                | 0              | -1.653703               | -0.002125 | -1.103618 |
| 14               | 1                | 0              | -0.235300               | 0.303409  | -1.993536 |
| 15               | 1                | 0              | 1.874264                | -0.042540 | -0.894841 |
| 16               | 1                | 0              | 1.891025                | 0.210738  | 5.642354  |
| 17               | 8                | 0              | -0.767056               | 0.024729  | 5.735995  |
| 18               | 1                | 0              | -1.666344               | -0.148286 | 3.415096  |
| 19               | 29               | 0              | 3.850257                | -0.560231 | 3.469133  |

[7-Xap-Cu]<sup>+1</sup>

Input orientation:

| Center<br>Number | Atomic<br>Number | Atomic<br>Type | Coordinates (Angstroms) |           |           |
|------------------|------------------|----------------|-------------------------|-----------|-----------|
|                  |                  |                | X                       | Y         | Z         |
| 1                | 6                | 0              | 0.010675                | 0.001042  | 0.025081  |
| 2                | 6                | 0              | -0.001026               | -0.002407 | 2.294886  |
| 3                | 6                | 0              | 1.396617                | -0.017205 | 2.375660  |
| 4                | 6                | 0              | 2.164307                | -0.023235 | 1.162119  |
| 5                | 8                | 0              | 3.399147                | -0.037032 | 1.090364  |
| 6                | 6                | 0              | -0.096630               | -0.005601 | 4.740753  |
| 7                | 6                | 0              | 1.381553                | -0.020679 | 4.695015  |
| 8                | 7                | 0              | 2.061046                | -0.025997 | 3.587454  |
| 9                | 7                | 0              | -0.694299               | 0.002826  | 3.464060  |
| 10               | 7                | 0              | -0.689229               | 0.006606  | 1.144988  |
| 11               | 7                | 0              | 1.386155                | -0.013111 | 0.007454  |
| 12               | 7                | 0              | -0.634912               | 0.009629  | -1.146427 |
| 13               | 1                | 0              | -1.643373               | 0.020040  | -1.127431 |
| 14               | 1                | 0              | -0.166834               | 0.005802  | -2.037694 |
| 15               | 1                | 0              | 1.902318                | -0.017916 | -0.864937 |
| 16               | 1                | 0              | 1.896470                | -0.027224 | 5.647157  |
| 17               | 8                | 0              | -0.742343               | -0.000971 | 5.757835  |

|    |    |   |           |           |          |
|----|----|---|-----------|-----------|----------|
| 18 | 1  | 0 | -1.709248 | 0.013514  | 3.426697 |
| 19 | 29 | 0 | 3.943944  | -0.045784 | 3.203909 |

[7-Xap-Cu]<sup>+2</sup>

Input orientation:

| Center<br>Number | Atomic<br>Number | Atomic<br>Type | Coordinates (Angstroms) |           |           |
|------------------|------------------|----------------|-------------------------|-----------|-----------|
|                  |                  |                | X                       | Y         | Z         |
| 1                | 6                | 0              | 2.758875                | -0.323364 | -0.013159 |
| 2                | 6                | 0              | 0.992753                | 1.125194  | 0.056124  |
| 3                | 6                | 0              | 0.071319                | 0.052449  | 0.093121  |
| 4                | 6                | 0              | 0.554289                | -1.276473 | 0.016120  |
| 5                | 8                | 0              | -0.231929               | -2.270439 | -0.005667 |
| 6                | 6                | 0              | -0.904957               | 2.655476  | -0.027435 |
| 7                | 6                | 0              | -1.786002               | 1.436997  | 0.023543  |
| 8                | 7                | 0              | -1.295826               | 0.237375  | 0.055325  |
| 9                | 7                | 0              | 0.476775                | 2.377812  | 0.018868  |
| 10               | 7                | 0              | 2.300679                | 0.927545  | 0.011096  |
| 11               | 7                | 0              | 1.907576                | -1.426669 | -0.041166 |
| 12               | 7                | 0              | 4.062202                | -0.533313 | -0.015236 |
| 13               | 1                | 0              | 4.675970                | 0.273491  | 0.009431  |
| 14               | 1                | 0              | 4.489038                | -1.450192 | -0.033561 |
| 15               | 1                | 0              | 2.271534                | -2.376139 | -0.084065 |
| 16               | 1                | 0              | -2.855033               | 1.613595  | 0.073252  |
| 17               | 8                | 0              | -1.357644               | 3.761154  | -0.068549 |
| 18               | 1                | 0              | 1.110706                | 3.176056  | -0.020057 |
| 19               | 29               | 0              | -2.043191               | -1.595292 | -0.014928 |

[7-Xap-Ag]

Input orientation:

| Center<br>Number | Atomic<br>Number | Atomic<br>Type | Coordinates (Angstroms) |           |           |
|------------------|------------------|----------------|-------------------------|-----------|-----------|
|                  |                  |                | X                       | Y         | Z         |
| 1                | 6                | 0              | -0.025148               | 0.031502  | 0.021985  |
| 2                | 6                | 0              | -0.009607               | 0.021028  | 2.285008  |
| 3                | 6                | 0              | 1.382597                | 0.097771  | 2.382731  |
| 4                | 6                | 0              | 2.157040                | 0.149276  | 1.161681  |
| 5                | 8                | 0              | 3.364834                | 0.209645  | 1.031768  |
| 6                | 6                | 0              | -0.137305               | 0.002995  | 4.731932  |
| 7                | 6                | 0              | 1.328707                | 0.075402  | 4.685129  |
| 8                | 7                | 0              | 2.026046                | 0.119191  | 3.591502  |
| 9                | 7                | 0              | -0.715659               | -0.027718 | 3.448511  |
| 10               | 7                | 0              | -0.721838               | -0.016006 | 1.133678  |
| 11               | 7                | 0              | 1.335180                | 0.106143  | 0.001126  |
| 12               | 7                | 0              | -0.681472               | 0.042764  | -1.166645 |
| 13               | 1                | 0              | -1.670818               | -0.143200 | -1.121049 |
| 14               | 1                | 0              | -0.205302               | -0.200811 | -2.019327 |
| 15               | 1                | 0              | 1.844488                | 0.172069  | -0.871034 |
| 16               | 1                | 0              | 1.842589                | 0.088563  | 5.640313  |
| 17               | 8                | 0              | -0.820668               | -0.026003 | 5.735148  |
| 18               | 1                | 0              | -1.726135               | -0.082483 | 3.395331  |
| 19               | 47               | 0              | 4.596811                | -0.797832 | 3.379150  |

[7-Xap-Ag]<sup>+1</sup>

Input orientation:

| Center<br>Number | Atomic<br>Number | Atomic<br>Type | Coordinates (Angstroms) |           |           |
|------------------|------------------|----------------|-------------------------|-----------|-----------|
|                  |                  |                | X                       | Y         | Z         |
| 1                | 6                | 0              | -0.006779               | 0.002080  | 0.026389  |
| 2                | 6                | 0              | -0.018023               | -0.000030 | 2.294620  |
| 3                | 6                | 0              | 1.383596                | -0.019085 | 2.386249  |
| 4                | 6                | 0              | 2.144464                | -0.028144 | 1.172211  |
| 5                | 8                | 0              | 3.378366                | -0.044625 | 1.068660  |
| 6                | 6                | 0              | -0.134505               | -0.001135 | 4.738529  |
| 7                | 6                | 0              | 1.346160                | -0.020910 | 4.698342  |
| 8                | 7                | 0              | 2.032364                | -0.029021 | 3.599953  |
| 9                | 7                | 0              | -0.720109               | 0.008229  | 3.458209  |
| 10               | 7                | 0              | -0.706844               | 0.010437  | 1.144968  |
| 11               | 7                | 0              | 1.366689                | -0.016468 | 0.015905  |
| 12               | 7                | 0              | -0.648334               | 0.011989  | -1.147762 |
| 13               | 1                | 0              | -1.656697               | 0.025750  | -1.132813 |
| 14               | 1                | 0              | -0.176759               | 0.006753  | -2.037143 |
| 15               | 1                | 0              | 1.887870                | -0.022566 | -0.853499 |
| 16               | 1                | 0              | 1.849362                | -0.028565 | 5.657716  |
| 17               | 8                | 0              | -0.787445               | 0.006361  | 5.751009  |
| 18               | 1                | 0              | -1.734626               | 0.021902  | 3.410104  |
| 19               | 47               | 0              | 4.365588                | -0.060655 | 3.195292  |

[7-Xap-Ag]<sup>+2</sup>

Input orientation:

| Center<br>Number | Atomic<br>Number | Atomic<br>Type | Coordinates (Angstroms) |           |           |
|------------------|------------------|----------------|-------------------------|-----------|-----------|
|                  |                  |                | X                       | Y         | Z         |
| 1                | 6                | 0              | 0.007044                | 0.002101  | 0.008631  |
| 2                | 6                | 0              | -0.078176               | 0.001805  | 2.297571  |
| 3                | 6                | 0              | 1.368163                | -0.017290 | 2.406321  |
| 4                | 6                | 0              | 2.149026                | -0.028269 | 1.152213  |
| 5                | 8                | 0              | 3.366644                | -0.044475 | 1.116265  |
| 6                | 6                | 0              | -0.154242               | -0.001735 | 4.727616  |
| 7                | 6                | 0              | 1.331811                | -0.017577 | 4.688165  |
| 8                | 7                | 0              | 2.034851                | -0.026344 | 3.576377  |
| 9                | 7                | 0              | -0.769059               | 0.009286  | 3.454677  |
| 10               | 7                | 0              | -0.709025               | 0.011277  | 1.144462  |
| 11               | 7                | 0              | 1.384614                | -0.018600 | -0.001109 |
| 12               | 7                | 0              | -0.647958               | 0.013333  | -1.132884 |
| 13               | 1                | 0              | -1.662819               | 0.028218  | -1.103467 |
| 14               | 1                | 0              | -0.201405               | 0.008363  | -2.042408 |
| 15               | 1                | 0              | 1.905664                | -0.024436 | -0.875754 |
| 16               | 1                | 0              | 1.835883                | -0.021714 | 5.649487  |
| 17               | 8                | 0              | -0.779107               | 0.000419  | 5.751847  |
| 18               | 1                | 0              | -1.789503               | 0.021538  | 3.426535  |
| 19               | 47               | 0              | 4.571933                | -0.073602 | 3.202393  |

[7-Xap-Au]

Input orientation:

| Center<br>Number | Atomic<br>Number | Atomic<br>Type | Coordinates (Angstroms) |           |           |
|------------------|------------------|----------------|-------------------------|-----------|-----------|
|                  |                  |                | X                       | Y         | Z         |
| 1                | 6                | 0              | -0.051453               | 0.036343  | 0.004846  |
| 2                | 6                | 0              | 0.006854                | 0.015769  | 2.266605  |
| 3                | 6                | 0              | 1.403582                | -0.019071 | 2.341371  |
| 4                | 6                | 0              | 2.162461                | -0.022248 | 1.103266  |
| 5                | 8                | 0              | 3.361104                | -0.042327 | 0.941433  |
| 6                | 6                | 0              | -0.098304               | -0.001972 | 4.714169  |
| 7                | 6                | 0              | 1.370826                | -0.038346 | 4.651972  |
| 8                | 7                | 0              | 2.048840                | -0.045353 | 3.548359  |
| 9                | 7                | 0              | -0.686607               | 0.023572  | 3.439714  |
| 10               | 7                | 0              | -0.728130               | 0.036684  | 1.131321  |
| 11               | 7                | 0              | 1.308119                | 0.007166  | -0.041288 |
| 12               | 7                | 0              | -0.730485               | 0.098442  | -1.166255 |
| 13               | 1                | 0              | -1.731499               | 0.002856  | -1.105262 |
| 14               | 1                | 0              | -0.288856               | -0.136514 | -2.039161 |
| 15               | 1                | 0              | 1.805227                | 0.038557  | -0.922433 |
| 16               | 1                | 0              | 1.899812                | -0.060426 | 5.597862  |
| 17               | 8                | 0              | -0.765285               | 0.006097  | 5.727225  |
| 18               | 1                | 0              | -1.698901               | 0.049249  | 3.394316  |
| 19               | 79               | 0              | 4.577035                | -0.126181 | 3.858878  |

[7-Xap-Au]<sup>+1</sup>

Input orientation:

| Center<br>Number | Atomic<br>Number | Atomic<br>Type | Coordinates (Angstroms) |           |           |
|------------------|------------------|----------------|-------------------------|-----------|-----------|
|                  |                  |                | X                       | Y         | Z         |
| 1                | 6                | 0              | -0.008924               | 0.002112  | 0.014903  |
| 2                | 6                | 0              | 0.000662                | -0.000532 | 2.284545  |
| 3                | 6                | 0              | 1.403853                | -0.019252 | 2.359308  |
| 4                | 6                | 0              | 2.162033                | -0.027919 | 1.134360  |
| 5                | 8                | 0              | 3.385171                | -0.043971 | 1.025439  |
| 6                | 6                | 0              | -0.107865               | -0.001758 | 4.729162  |
| 7                | 6                | 0              | 1.371725                | -0.021404 | 4.689462  |
| 8                | 7                | 0              | 2.042720                | -0.029091 | 3.576519  |
| 9                | 7                | 0              | -0.695040               | 0.007402  | 3.453077  |
| 10               | 7                | 0              | -0.696941               | 0.009998  | 1.143736  |
| 11               | 7                | 0              | 1.362219                | -0.016055 | -0.011913 |
| 12               | 7                | 0              | -0.668261               | 0.012182  | -1.147226 |
| 13               | 1                | 0              | -1.676616               | 0.025580  | -1.116560 |
| 14               | 1                | 0              | -0.210935               | 0.007208  | -2.044379 |
| 15               | 1                | 0              | 1.872143                | -0.021795 | -0.888147 |
| 16               | 1                | 0              | 1.884127                | -0.029276 | 5.641286  |
| 17               | 8                | 0              | -0.749539               | 0.005690  | 5.747816  |
| 18               | 1                | 0              | -1.709941               | 0.020939  | 3.407443  |
| 19               | 79               | 0              | 4.203747                | -0.057761 | 3.448109  |

[7-Xap-Au]<sup>+2</sup>

Input orientation:

| Center<br>Number | Atomic<br>Number | Atomic<br>Type | Coordinates (Angstroms) |   |   |
|------------------|------------------|----------------|-------------------------|---|---|
|                  |                  |                | X                       | Y | Z |

|    |    |   |           |           |           |
|----|----|---|-----------|-----------|-----------|
| 1  | 6  | 0 | 0.007924  | 0.002345  | -0.008210 |
| 2  | 6  | 0 | -0.047420 | 0.000541  | 2.287460  |
| 3  | 6  | 0 | 1.400418  | -0.019605 | 2.373760  |
| 4  | 6  | 0 | 2.168248  | -0.028763 | 1.105884  |
| 5  | 8  | 0 | 3.378460  | -0.045388 | 1.055854  |
| 6  | 6  | 0 | -0.116170 | -0.001181 | 4.716890  |
| 7  | 6  | 0 | 1.370216  | -0.021705 | 4.674748  |
| 8  | 7  | 0 | 2.063752  | -0.030119 | 3.553843  |
| 9  | 7  | 0 | -0.732934 | 0.008731  | 3.450343  |
| 10 | 7  | 0 | -0.690019 | 0.010704  | 1.143894  |
| 11 | 7  | 0 | 1.379570  | -0.016577 | -0.037361 |
| 12 | 7  | 0 | -0.673376 | 0.013019  | -1.132893 |
| 13 | 1  | 0 | -1.687709 | 0.026983  | -1.080917 |
| 14 | 1  | 0 | -0.247472 | 0.008163  | -2.052877 |
| 15 | 1  | 0 | 1.890183  | -0.022592 | -0.918489 |
| 16 | 1  | 0 | 1.879292  | -0.029767 | 5.632327  |
| 17 | 8  | 0 | -0.724810 | 0.006096  | 5.749636  |
| 18 | 1  | 0 | -1.753629 | 0.022868  | 3.424337  |
| 19 | 79 | 0 | 4.299817  | -0.061456 | 3.508711  |

[7-Xap-Zn]

Input orientation:

| Center Number | Atomic Number | Atomic Type | Coordinates (Angstroms) |           |           |
|---------------|---------------|-------------|-------------------------|-----------|-----------|
|               |               |             | X                       | Y         | Z         |
| 1             | 6             | 0           | 2.869670                | -1.765974 | -0.303366 |
| 2             | 6             | 0           | 2.176198                | 0.380057  | -0.138641 |
| 3             | 6             | 0           | 0.934539                | 0.058342  | 0.417547  |
| 4             | 6             | 0           | 0.622234                | -1.342470 | 0.646914  |
| 5             | 8             | 0           | -0.373074               | -1.839670 | 1.119807  |
| 6             | 6             | 0           | 1.569186                | 2.750909  | -0.022481 |
| 7             | 6             | 0           | 0.306005                | 2.263416  | 0.553091  |
| 8             | 7             | 0           | 0.019891                | 1.018075  | 0.753459  |
| 9             | 7             | 0           | 2.447960                | 1.701203  | -0.337411 |
| 10            | 7             | 0           | 3.140385                | -0.498420 | -0.509109 |
| 11            | 7             | 0           | 1.696739                | -2.196460 | 0.234069  |
| 12            | 7             | 0           | 3.814375                | -2.697161 | -0.604564 |
| 13            | 1             | 0           | 4.606543                | -2.355890 | -1.125715 |
| 14            | 1             | 0           | 3.552946                | -3.658679 | -0.747672 |
| 15            | 1             | 0           | 1.533112                | -3.178307 | 0.416565  |
| 16            | 1             | 0           | -0.421581               | 3.024069  | 0.819953  |
| 17            | 8             | 0           | 1.867029                | 3.911672  | -0.222850 |
| 18            | 1             | 0           | 3.344552                | 1.949159  | -0.739415 |
| 19            | 30            | 0           | -5.108989               | -0.257090 | -0.315762 |

[7-Xap-Zn]<sup>+1</sup>

Input orientation:

| Center Number | Atomic Number | Atomic Type | Coordinates (Angstroms) |           |          |
|---------------|---------------|-------------|-------------------------|-----------|----------|
|               |               |             | X                       | Y         | Z        |
| 1             | 6             | 0           | 0.002400                | 0.001203  | 0.025542 |
| 2             | 6             | 0           | -0.028489               | -0.000563 | 2.294549 |

|    |    |   |           |           |           |
|----|----|---|-----------|-----------|-----------|
| 3  | 6  | 0 | 1.369798  | -0.018972 | 2.382081  |
| 4  | 6  | 0 | 2.138860  | -0.027801 | 1.181931  |
| 5  | 8  | 0 | 3.378890  | -0.043888 | 1.131628  |
| 6  | 6  | 0 | -0.117286 | -0.001550 | 4.741848  |
| 7  | 6  | 0 | 1.364832  | -0.020871 | 4.690512  |
| 8  | 7  | 0 | 2.035192  | -0.028706 | 3.583307  |
| 9  | 7  | 0 | -0.718829 | 0.007452  | 3.464391  |
| 10 | 7  | 0 | -0.707117 | 0.009451  | 1.139966  |
| 11 | 7  | 0 | 1.380103  | -0.016634 | 0.019529  |
| 12 | 7  | 0 | -0.631914 | 0.010867  | -1.151052 |
| 13 | 1  | 0 | -1.640655 | 0.024223  | -1.141358 |
| 14 | 1  | 0 | -0.156326 | 0.005844  | -2.038542 |
| 15 | 1  | 0 | 1.903968  | -0.022489 | -0.848512 |
| 16 | 1  | 0 | 1.883248  | -0.028471 | 5.642497  |
| 17 | 8  | 0 | -0.760816 | 0.006110  | 5.758983  |
| 18 | 1  | 0 | -1.734112 | 0.020835  | 3.431748  |
| 19 | 30 | 0 | 4.202593  | -0.053745 | 3.137891  |

[7-Xap-Zn]<sup>+2</sup>

Input orientation:

| Center<br>Number | Atomic<br>Number | Atomic<br>Type | Coordinates (Angstroms) |           |           |
|------------------|------------------|----------------|-------------------------|-----------|-----------|
|                  |                  |                | X                       | Y         | Z         |
| 1                | 6                | 0              | 0.019268                | 0.000226  | 0.019902  |
| 2                | 6                | 0              | -0.033199               | -0.000622 | 2.300248  |
| 3                | 6                | 0              | 1.379371                | -0.018244 | 2.380723  |
| 4                | 6                | 0              | 2.124359                | -0.025492 | 1.182370  |
| 5                | 8                | 0              | 3.407192                | -0.041310 | 1.145593  |
| 6                | 6                | 0              | -0.116109               | -0.002266 | 4.745618  |
| 7                | 6                | 0              | 1.382495                | -0.019955 | 4.714633  |
| 8                | 7                | 0              | 2.045517                | -0.027117 | 3.600635  |
| 9                | 7                | 0              | -0.719009               | 0.006352  | 3.469050  |
| 10               | 7                | 0              | -0.684407               | 0.008066  | 1.147345  |
| 11               | 7                | 0              | 1.411464                | -0.016131 | 0.022175  |
| 12               | 7                | 0              | -0.609018               | 0.008787  | -1.142903 |
| 13               | 1                | 0              | -1.622173               | 0.020924  | -1.136307 |
| 14               | 1                | 0              | -0.142581               | 0.004092  | -2.039442 |
| 15               | 1                | 0              | 1.942961                | -0.022319 | -0.845071 |
| 16               | 1                | 0              | 1.888423                | -0.026667 | 5.673190  |
| 17               | 8                | 0              | -0.728606               | 0.004433  | 5.771418  |
| 18               | 1                | 0              | -1.738069               | 0.018726  | 3.440329  |
| 19               | 30               | 0              | 3.956463                | -0.049186 | 2.997435  |

[7-Xap-Cd]

Input orientation:

| Center<br>Number | Atomic<br>Number | Atomic<br>Type | Coordinates (Angstroms) |           |          |
|------------------|------------------|----------------|-------------------------|-----------|----------|
|                  |                  |                | X                       | Y         | Z        |
| 1                | 6                | 0              | -0.071378               | 0.060405  | 0.014279 |
| 2                | 6                | 0              | -0.063001               | 0.036969  | 2.275612 |
| 3                | 6                | 0              | 1.329430                | -0.031258 | 2.382943 |
| 4                | 6                | 0              | 2.114857                | -0.051645 | 1.163247 |
| 5                | 8                | 0              | 3.318141                | -0.099561 | 1.027171 |



|    |    |   |           |           |           |
|----|----|---|-----------|-----------|-----------|
| 6  | 6  | 0 | -0.210760 | 0.019012  | 4.721345  |
| 7  | 6  | 0 | 1.259049  | -0.051517 | 4.679864  |
| 8  | 7  | 0 | 1.961907  | -0.073839 | 3.594728  |
| 9  | 7  | 0 | -0.777595 | 0.060251  | 3.435978  |
| 10 | 7  | 0 | -0.774144 | 0.075222  | 1.122932  |
| 11 | 7  | 0 | 1.288449  | -0.001166 | -0.001443 |
| 12 | 7  | 0 | -0.719842 | 0.145078  | -1.176392 |
| 13 | 1  | 0 | -1.722753 | 0.056936  | -1.134200 |
| 14 | 1  | 0 | -0.267273 | -0.141001 | -2.028655 |
| 15 | 1  | 0 | 1.804699  | 0.025459  | -0.871543 |
| 16 | 1  | 0 | 1.764618  | -0.086170 | 5.640073  |
| 17 | 8  | 0 | -0.899142 | 0.041509  | 5.721190  |
| 18 | 1  | 0 | -1.788006 | 0.109933  | 3.374540  |
| 19 | 48 | 0 | 5.617084  | -0.272320 | 3.505271  |

[7-Xap-Cd]<sup>+1</sup>

Input orientation:

| Center<br>Number | Atomic<br>Number | Atomic<br>Type | Coordinates (Angstroms) |           |           |
|------------------|------------------|----------------|-------------------------|-----------|-----------|
|                  |                  |                | X                       | Y         | Z         |
| 1                | 6                | 0              | -0.011450               | 0.002374  | 0.025861  |
| 2                | 6                | 0              | -0.037591               | 0.000711  | 2.294244  |
| 3                | 6                | 0              | 1.363493                | -0.019202 | 2.387445  |
| 4                | 6                | 0              | 2.126163                | -0.028660 | 1.184169  |
| 5                | 8                | 0              | 3.368625                | -0.046379 | 1.103499  |
| 6                | 6                | 0              | -0.143784               | -0.000255 | 4.739819  |
| 7                | 6                | 0              | 1.338546                | -0.021169 | 4.695703  |
| 8                | 7                | 0              | 2.019272                | -0.029712 | 3.595393  |
| 9                | 7                | 0              | -0.735653               | 0.009339  | 3.459179  |
| 10               | 7                | 0              | -0.718381               | 0.011389  | 1.140580  |
| 11               | 7                | 0              | 1.365047                | -0.016923 | 0.022566  |
| 12               | 7                | 0              | -0.645056               | 0.012366  | -1.151636 |
| 13               | 1                | 0              | -1.653718               | 0.026809  | -1.142713 |
| 14               | 1                | 0              | -0.168785               | 0.007065  | -2.038685 |
| 15               | 1                | 0              | 1.890779                | -0.023711 | -0.844309 |
| 16               | 1                | 0              | 1.848911                | -0.029238 | 5.652063  |
| 17               | 8                | 0              | -0.794346               | 0.007738  | 5.752620  |
| 18               | 1                | 0              | -1.750577               | 0.023670  | 3.417598  |
| 19               | 48               | 0              | 4.502844                | -0.063915 | 3.153545  |

[7-Xap-Cd]<sup>+2</sup>

Input orientation:

| Center<br>Number | Atomic<br>Number | Atomic<br>Type | Coordinates (Angstroms) |           |          |
|------------------|------------------|----------------|-------------------------|-----------|----------|
|                  |                  |                | X                       | Y         | Z        |
| 1                | 6                | 0              | 0.003871                | 0.001355  | 0.019939 |
| 2                | 6                | 0              | -0.035426               | -0.000023 | 2.297715 |
| 3                | 6                | 0              | 1.379581                | -0.018644 | 2.382570 |
| 4                | 6                | 0              | 2.119872                | -0.027068 | 1.179528 |
| 5                | 8                | 0              | 3.393715                | -0.043845 | 1.103628 |
| 6                | 6                | 0              | -0.139339               | -0.001105 | 4.739704 |
| 7                | 6                | 0              | 1.357135                | -0.020418 | 4.711854 |
| 8                | 7                | 0              | 2.031933                | -0.028208 | 3.605562 |

|    |    |   |           |           |           |
|----|----|---|-----------|-----------|-----------|
| 9  | 7  | 0 | -0.730761 | 0.007921  | 3.462080  |
| 10 | 7  | 0 | -0.695122 | 0.009551  | 1.148348  |
| 11 | 7  | 0 | 1.391501  | -0.016639 | 0.021919  |
| 12 | 7  | 0 | -0.628673 | 0.010608  | -1.142673 |
| 13 | 1  | 0 | -1.641219 | 0.023765  | -1.133003 |
| 14 | 1  | 0 | -0.163915 | 0.005540  | -2.039527 |
| 15 | 1  | 0 | 1.921389  | -0.023093 | -0.845615 |
| 16 | 1  | 0 | 1.852689  | -0.027604 | 5.675452  |
| 17 | 8  | 0 | -0.759066 | 0.005876  | 5.762918  |
| 18 | 1  | 0 | -1.748991 | 0.021162  | 3.421509  |
| 19 | 48 | 0 | 4.255166  | -0.056834 | 3.075031  |

[7-Xap-Hg]

Input orientation:

| Center<br>Number | Atomic<br>Number | Atomic<br>Type | Coordinates (Angstroms) |           |           |
|------------------|------------------|----------------|-------------------------|-----------|-----------|
|                  |                  |                | X                       | Y         | Z         |
| 1                | 6                | 0              | -0.075963               | 0.054169  | 0.011772  |
| 2                | 6                | 0              | -0.073499               | 0.029274  | 2.273083  |
| 3                | 6                | 0              | 1.319227                | -0.025332 | 2.385454  |
| 4                | 6                | 0              | 2.109326                | -0.037164 | 1.167589  |
| 5                | 8                | 0              | 3.312188                | -0.072920 | 1.033234  |
| 6                | 6                | 0              | -0.230834               | 0.008382  | 4.718029  |
| 7                | 6                | 0              | 1.239466                | -0.047621 | 4.681679  |
| 8                | 7                | 0              | 1.947461                | -0.062430 | 3.599656  |
| 9                | 7                | 0              | -0.792821               | 0.044837  | 3.430762  |
| 10               | 7                | 0              | -0.782074               | 0.061153  | 1.118201  |
| 11               | 7                | 0              | 1.283962                | 0.005973  | 0.000072  |
| 12               | 7                | 0              | -0.722043               | 0.134193  | -1.181264 |
| 13               | 1                | 0              | -1.723832               | 0.032946  | -1.140748 |
| 14               | 1                | 0              | -0.265068               | -0.154088 | -2.030510 |
| 15               | 1                | 0              | 1.802492                | 0.039194  | -0.868409 |
| 16               | 1                | 0              | 1.740994                | -0.077834 | 5.644134  |
| 17               | 8                | 0              | -0.923645               | 0.023454  | 5.715326  |
| 18               | 1                | 0              | -1.803367               | 0.084623  | 3.365058  |
| 19               | 80               | 0              | 5.802369                | -0.218513 | 3.523822  |

[7-Xap-Hg]<sup>+1</sup>

Input orientation:

| Center<br>Number | Atomic<br>Number | Atomic<br>Type | Coordinates (Angstroms) |           |          |
|------------------|------------------|----------------|-------------------------|-----------|----------|
|                  |                  |                | X                       | Y         | Z        |
| 1                | 6                | 0              | -0.018587               | 0.003346  | 0.023582 |
| 2                | 6                | 0              | -0.033012               | 0.000845  | 2.290892 |
| 3                | 6                | 0              | 1.369958                | -0.019683 | 2.384240 |
| 4                | 6                | 0              | 2.131266                | -0.029348 | 1.173127 |
| 5                | 8                | 0              | 3.366709                | -0.047257 | 1.068066 |
| 6                | 6                | 0              | -0.150402               | -0.000182 | 4.737433 |
| 7                | 6                | 0              | 1.331395                | -0.021715 | 4.696713 |
| 8                | 7                | 0              | 2.010061                | -0.030365 | 3.596602 |
| 9                | 7                | 0              | -0.733918               | 0.009749  | 3.454972 |
| 10               | 7                | 0              | -0.720364               | 0.012193  | 1.141304 |
| 11               | 7                | 0              | 1.355493                | -0.016780 | 0.015808 |

|    |    |   |           |           |           |
|----|----|---|-----------|-----------|-----------|
| 12 | 7  | 0 | -0.658523 | 0.013338  | -1.150904 |
| 13 | 1  | 0 | -1.667044 | 0.028063  | -1.136579 |
| 14 | 1  | 0 | -0.186718 | 0.007702  | -2.040243 |
| 15 | 1  | 0 | 1.877246  | -0.023643 | -0.853271 |
| 16 | 1  | 0 | 1.840282  | -0.030124 | 5.653733  |
| 17 | 8  | 0 | -0.804904 | 0.008246  | 5.748102  |
| 18 | 1  | 0 | -1.748482 | 0.024577  | 3.407243  |
| 19 | 80 | 0 | 4.603882  | -0.066665 | 3.236122  |

[7-Xap-Hg]<sup>+2</sup>

Input orientation:

| Center<br>Number | Atomic<br>Number | Atomic<br>Type | Coordinates (Angstroms) |           |           |
|------------------|------------------|----------------|-------------------------|-----------|-----------|
|                  |                  |                | X                       | Y         | Z         |
| 1                | 6                | 0              | -0.001093               | -0.002290 | 0.017027  |
| 2                | 6                | 0              | -0.031926               | -0.006108 | 2.293965  |
| 3                | 6                | 0              | 1.385249                | -0.011487 | 2.379612  |
| 4                | 6                | 0              | 2.126564                | -0.012502 | 1.167959  |
| 5                | 8                | 0              | 3.389275                | -0.022829 | 1.072958  |
| 6                | 6                | 0              | -0.148804               | 0.011788  | 4.735158  |
| 7                | 6                | 0              | 1.353342                | -0.022668 | 4.715219  |
| 8                | 7                | 0              | 2.010009                | -0.029115 | 3.604006  |
| 9                | 7                | 0              | -0.729907               | 0.004934  | 3.459181  |
| 10               | 7                | 0              | -0.696221               | 0.001384  | 1.149419  |
| 11               | 7                | 0              | 1.384027                | -0.011479 | 0.015446  |
| 12               | 7                | 0              | -0.639741               | 0.006014  | -1.141167 |
| 13               | 1                | 0              | -1.652486               | 0.018338  | -1.126383 |
| 14               | 1                | 0              | -0.179866               | 0.000026  | -2.040846 |
| 15               | 1                | 0              | 1.909160                | -0.011743 | -0.855068 |
| 16               | 1                | 0              | 1.848735                | -0.051550 | 5.677903  |
| 17               | 8                | 0              | -0.766685               | 0.029650  | 5.759275  |
| 18               | 1                | 0              | -1.748013               | 0.017471  | 3.412406  |
| 19               | 80               | 0              | 4.352722                | -0.085539 | 3.150871  |

[Sep-Cu]

Input orientation:

| Center<br>Number | Atomic<br>Number | Atomic<br>Type | Coordinates (Angstroms) |           |           |
|------------------|------------------|----------------|-------------------------|-----------|-----------|
|                  |                  |                | X                       | Y         | Z         |
| 1                | 6                | 0              | 0.146649                | 0.098093  | 0.062371  |
| 2                | 6                | 0              | -0.016194               | 0.453817  | 2.303574  |
| 3                | 6                | 0              | 1.356438                | 0.280303  | 2.476600  |
| 4                | 6                | 0              | 2.107510                | -0.290773 | 1.424791  |
| 5                | 8                | 0              | 3.231359                | -0.855594 | 1.563604  |
| 6                | 6                | 0              | -0.239523               | 0.533251  | 4.803434  |
| 7                | 6                | 0              | 1.199351                | 0.034324  | 4.804621  |
| 8                | 7                | 0              | 1.951745                | 0.247920  | 3.702935  |
| 9                | 7                | 0              | -0.765366               | 0.626429  | 3.414018  |
| 10               | 7                | 0              | -0.614136               | 0.417151  | 1.077673  |
| 11               | 7                | 0              | 1.464323                | -0.270463 | 0.185140  |
| 12               | 7                | 0              | -0.363901               | 0.164212  | -1.215501 |
| 13               | 1                | 0              | -1.368973               | 0.257774  | -1.227099 |
| 14               | 1                | 0              | -0.003085               | -0.486056 | -1.898351 |

|    |    |   |           |           |           |
|----|----|---|-----------|-----------|-----------|
| 15 | 1  | 0 | 1.990702  | -0.612269 | -0.607519 |
| 16 | 1  | 0 | -1.761487 | 0.708814  | 3.283357  |
| 17 | 1  | 0 | -0.304824 | 1.525087  | 5.266775  |
| 18 | 1  | 0 | -0.888157 | -0.126748 | 5.377628  |
| 19 | 6  | 0 | 1.895592  | -0.710522 | 5.784841  |
| 20 | 6  | 0 | 1.468418  | -0.891124 | 7.226647  |
| 21 | 6  | 0 | 2.552314  | -0.378051 | 8.178524  |
| 22 | 1  | 0 | 2.286586  | -0.594104 | 9.219580  |
| 23 | 1  | 0 | 2.664614  | 0.702943  | 8.062695  |
| 24 | 1  | 0 | 3.503124  | -0.859928 | 7.950791  |
| 25 | 8  | 0 | 0.223559  | -0.216603 | 7.452750  |
| 26 | 8  | 0 | 3.008831  | -1.318369 | 5.488260  |
| 27 | 1  | 0 | 0.025991  | -0.284694 | 8.391256  |
| 28 | 1  | 0 | 1.336456  | -1.970924 | 7.394551  |
| 29 | 29 | 0 | 3.406468  | -1.132767 | 3.580880  |

[Sep-Cu]<sup>+1</sup>

Input orientation:

| Center<br>Number | Atomic<br>Number | Atomic<br>Type | Coordinates (Angstroms) |           |           |
|------------------|------------------|----------------|-------------------------|-----------|-----------|
|                  |                  |                | X                       | Y         | Z         |
| 1                | 6                | 0              | 0.165841                | 0.249224  | 0.037861  |
| 2                | 6                | 0              | -0.091081               | 0.227744  | 2.297250  |
| 3                | 6                | 0              | 1.197222                | -0.310410 | 2.448187  |
| 4                | 6                | 0              | 2.032355                | -0.601172 | 1.337376  |
| 5                | 8                | 0              | 3.174121                | -1.087776 | 1.416339  |
| 6                | 6                | 0              | -0.320497               | 0.170610  | 4.804318  |
| 7                | 6                | 0              | 1.088814                | -0.414560 | 4.779968  |
| 8                | 7                | 0              | 1.702556                | -0.595712 | 3.659983  |
| 9                | 7                | 0              | -0.792752               | 0.449309  | 3.415025  |
| 10               | 7                | 0              | -0.602716               | 0.508577  | 1.085303  |
| 11               | 7                | 0              | 1.436606                | -0.284338 | 0.115086  |
| 12               | 7                | 0              | -0.314100               | 0.519131  | -1.183783 |
| 13               | 1                | 0              | -1.242431               | 0.907287  | -1.246174 |
| 14               | 1                | 0              | 0.202113                | 0.352587  | -2.031466 |
| 15               | 1                | 0              | 1.980153                | -0.467889 | -0.719422 |
| 16               | 1                | 0              | -1.720870               | 0.834990  | 3.305139  |
| 17               | 1                | 0              | -0.343236               | 1.095480  | 5.383594  |
| 18               | 1                | 0              | -1.014610               | -0.519094 | 5.287718  |
| 19               | 6                | 0              | 1.971463                | -0.862328 | 5.911031  |
| 20               | 6                | 0              | 1.559859                | -0.790917 | 7.367402  |
| 21               | 6                | 0              | 2.573338                | 0.012933  | 8.188085  |
| 22               | 1                | 0              | 2.301231                | -0.018424 | 9.245902  |
| 23               | 1                | 0              | 2.585321                | 1.056235  | 7.864921  |
| 24               | 1                | 0              | 3.572394                | -0.409509 | 8.077747  |
| 25               | 8                | 0              | 0.248497                | -0.242875 | 7.428886  |
| 26               | 8                | 0              | 3.087729                | -1.323990 | 5.643504  |
| 27               | 1                | 0              | -0.027714               | -0.201476 | 8.349917  |
| 28               | 1                | 0              | 1.557957                | -1.833117 | 7.719263  |
| 29               | 29               | 0              | 3.526819                | -1.369388 | 3.539863  |

[Sep-Cu]<sup>+2</sup>

Input orientation:

| Center<br>Number | Atomic<br>Number | Atomic<br>Type | Coordinates (Angstroms) |           |           |
|------------------|------------------|----------------|-------------------------|-----------|-----------|
|                  |                  |                | X                       | Y         | Z         |
| 1                | 6                | 0              | 0.202747                | 0.235339  | 0.037673  |
| 2                | 6                | 0              | -0.166198               | 0.260759  | 2.294960  |
| 3                | 6                | 0              | 1.107078                | -0.333959 | 2.462278  |
| 4                | 6                | 0              | 1.974654                | -0.642707 | 1.400249  |
| 5                | 8                | 0              | 3.118615                | -1.153088 | 1.620981  |
| 6                | 6                | 0              | -0.394961               | 0.198461  | 4.813063  |
| 7                | 6                | 0              | 1.010616                | -0.397897 | 4.817215  |
| 8                | 7                | 0              | 1.591429                | -0.600336 | 3.672221  |
| 9                | 7                | 0              | -0.847041               | 0.514583  | 3.411522  |
| 10               | 7                | 0              | -0.594592               | 0.534449  | 1.064329  |
| 11               | 7                | 0              | 1.477712                | -0.343377 | 0.164559  |
| 12               | 7                | 0              | -0.219269               | 0.496096  | -1.188783 |
| 13               | 1                | 0              | -1.135581               | 0.913628  | -1.296581 |
| 14               | 1                | 0              | 0.315026                | 0.301596  | -2.024021 |
| 15               | 1                | 0              | 2.048867                | -0.542128 | -0.651995 |
| 16               | 1                | 0              | -1.759982               | 0.947635  | 3.318196  |
| 17               | 1                | 0              | -0.417784               | 1.112401  | 5.407617  |
| 18               | 1                | 0              | -1.098049               | -0.501943 | 5.267503  |
| 19               | 6                | 0              | 1.937057                | -0.849850 | 5.887731  |
| 20               | 6                | 0              | 1.613207                | -0.791450 | 7.350158  |
| 21               | 6                | 0              | 2.659261                | 0.026647  | 8.128010  |
| 22               | 1                | 0              | 2.413209                | -0.008560 | 9.190848  |
| 23               | 1                | 0              | 2.652069                | 1.068767  | 7.803755  |
| 24               | 1                | 0              | 3.656397                | -0.394801 | 7.996077  |
| 25               | 8                | 0              | 0.301907                | -0.265448 | 7.432296  |
| 26               | 8                | 0              | 3.051902                | -1.314222 | 5.517369  |
| 27               | 1                | 0              | 0.017248                | -0.237341 | 8.353244  |
| 28               | 1                | 0              | 1.650147                | -1.836804 | 7.697856  |
| 29               | 29               | 0              | 3.328692                | -1.345320 | 3.580495  |

[Sep-Ag]

Input orientation:

| Center<br>Number | Atomic<br>Number | Atomic<br>Type | Coordinates (Angstroms) |           |           |
|------------------|------------------|----------------|-------------------------|-----------|-----------|
|                  |                  |                | X                       | Y         | Z         |
| 1                | 6                | 0              | 0.037762                | 0.094123  | 0.040093  |
| 2                | 6                | 0              | -0.019153               | -0.015489 | 2.308096  |
| 3                | 6                | 0              | 1.371854                | -0.107954 | 2.414511  |
| 4                | 6                | 0              | 2.165047                | -0.139458 | 1.226989  |
| 5                | 8                | 0              | 3.394162                | -0.277528 | 1.145828  |
| 6                | 6                | 0              | -0.117046               | 0.226786  | 4.756396  |
| 7                | 6                | 0              | 1.327470                | -0.250715 | 4.766921  |
| 8                | 7                | 0              | 1.990553                | -0.299524 | 3.611783  |
| 9                | 7                | 0              | -0.743043               | -0.084345 | 3.458942  |
| 10               | 7                | 0              | -0.688402               | 0.077881  | 1.125474  |
| 11               | 7                | 0              | 1.402057                | -0.001711 | 0.049772  |
| 12               | 7                | 0              | -0.567773               | 0.271400  | -1.187867 |
| 13               | 1                | 0              | -1.572088               | 0.180610  | -1.133396 |
| 14               | 1                | 0              | -0.161097               | -0.218210 | -1.972292 |
| 15               | 1                | 0              | 1.934619                | 0.059514  | -0.807487 |
| 16               | 1                | 0              | -1.730294               | 0.099629  | 3.358388  |
| 17               | 1                | 0              | -0.151089               | 1.307094  | 4.953569  |

|    |    |   |           |           |          |
|----|----|---|-----------|-----------|----------|
| 18 | 1  | 0 | -0.699970 | -0.252701 | 5.543516 |
| 19 | 6  | 0 | 2.070569  | -0.548434 | 5.950207 |
| 20 | 6  | 0 | 1.369411  | -0.495836 | 7.310528 |
| 21 | 6  | 0 | 2.316105  | -0.778014 | 8.468409 |
| 22 | 1  | 0 | 1.768934  | -0.748250 | 9.417083 |
| 23 | 1  | 0 | 3.110784  | -0.031471 | 8.492560 |
| 24 | 1  | 0 | 2.776993  | -1.761357 | 8.363742 |
| 25 | 8  | 0 | 0.768315  | 0.808216  | 7.434227 |
| 26 | 8  | 0 | 3.299130  | -0.874892 | 5.929167 |
| 27 | 1  | 0 | 0.305095  | 0.832168  | 8.278560 |
| 28 | 1  | 0 | 0.568428  | -1.254908 | 7.310469 |
| 29 | 47 | 0 | 4.189026  | -0.694374 | 3.691403 |

[Sep-Ag]<sup>+1</sup>

Input orientation:

| Center<br>Number | Atomic<br>Number | Atomic<br>Type | Coordinates (Angstroms) |           |           |
|------------------|------------------|----------------|-------------------------|-----------|-----------|
|                  |                  |                | X                       | Y         | Z         |
| 1                | 6                | 0              | 0.066701                | 0.082828  | 0.033484  |
| 2                | 6                | 0              | -0.061510               | 0.069443  | 2.302083  |
| 3                | 6                | 0              | 1.338662                | -0.087497 | 2.430743  |
| 4                | 6                | 0              | 2.151490                | -0.223589 | 1.263453  |
| 5                | 8                | 0              | 3.364697                | -0.451340 | 1.222881  |
| 6                | 6                | 0              | -0.193469               | 0.246816  | 4.770861  |
| 7                | 6                | 0              | 1.252221                | -0.233750 | 4.753755  |
| 8                | 7                | 0              | 1.903574                | -0.314502 | 3.642654  |
| 9                | 7                | 0              | -0.785010               | 0.081975  | 3.428743  |
| 10               | 7                | 0              | -0.688663               | 0.148507  | 1.116603  |
| 11               | 7                | 0              | 1.427451                | -0.086244 | 0.068390  |
| 12               | 7                | 0              | -0.523103               | 0.183939  | -1.165861 |
| 13               | 1                | 0              | -1.522442               | 0.314210  | -1.186531 |
| 14               | 1                | 0              | -0.016331               | 0.163157  | -2.034969 |
| 15               | 1                | 0              | 1.970670                | -0.165013 | -0.782702 |
| 16               | 1                | 0              | -1.786199               | 0.176070  | 3.325889  |
| 17               | 1                | 0              | -0.228985               | 1.295524  | 5.085058  |
| 18               | 1                | 0              | -0.791079               | -0.314001 | 5.488331  |
| 19               | 6                | 0              | 2.057125                | -0.604774 | 5.969315  |
| 20               | 6                | 0              | 1.404265                | -0.579044 | 7.350347  |
| 21               | 6                | 0              | 2.419436                | -0.621473 | 8.483258  |
| 22               | 1                | 0              | 1.899459                | -0.651587 | 9.444258  |
| 23               | 1                | 0              | 3.055350                | 0.264913  | 8.456073  |
| 24               | 1                | 0              | 3.050629                | -1.507262 | 8.409111  |
| 25               | 8                | 0              | 0.589063                | 0.591014  | 7.384078  |
| 26               | 8                | 0              | 3.223769                | -0.958964 | 5.856690  |
| 27               | 1                | 0              | 0.185474                | 0.658223  | 8.255801  |
| 28               | 1                | 0              | 0.771687                | -1.483948 | 7.393166  |
| 29               | 47               | 0              | 4.181426                | -0.871380 | 3.540628  |

[Sep-Ag]<sup>+2</sup>

Input orientation:

| Center<br>Number | Atomic<br>Number | Atomic<br>Type | Coordinates (Angstroms) |   |   |
|------------------|------------------|----------------|-------------------------|---|---|
|                  |                  |                | X                       | Y | Z |

|    |    |   |           |           |           |
|----|----|---|-----------|-----------|-----------|
| 1  | 6  | 0 | 0.126174  | 0.278738  | 0.042604  |
| 2  | 6  | 0 | -0.058888 | 0.195150  | 2.316134  |
| 3  | 6  | 0 | 1.290137  | -0.312939 | 2.454101  |
| 4  | 6  | 0 | 2.090997  | -0.528487 | 1.236838  |
| 5  | 8  | 0 | 3.232344  | -0.952098 | 1.242383  |
| 6  | 6  | 0 | -0.206371 | 0.078903  | 4.786859  |
| 7  | 6  | 0 | 1.196889  | -0.441850 | 4.756788  |
| 8  | 7  | 0 | 1.849537  | -0.601644 | 3.631990  |
| 9  | 7  | 0 | -0.732000 | 0.367939  | 3.451572  |
| 10 | 7  | 0 | -0.602224 | 0.475662  | 1.144933  |
| 11 | 7  | 0 | 1.420901  | -0.203302 | 0.066054  |
| 12 | 7  | 0 | -0.420085 | 0.559188  | -1.126662 |
| 13 | 1  | 0 | -1.369697 | 0.911839  | -1.137634 |
| 14 | 1  | 0 | 0.053630  | 0.442028  | -2.012172 |
| 15 | 1  | 0 | 1.943446  | -0.340958 | -0.795085 |
| 16 | 1  | 0 | -1.681190 | 0.725110  | 3.379462  |
| 17 | 1  | 0 | -0.254942 | 0.977804  | 5.414905  |
| 18 | 1  | 0 | -0.857126 | -0.638927 | 5.302854  |
| 19 | 6  | 0 | 2.026248  | -0.849023 | 5.999608  |
| 20 | 6  | 0 | 1.489715  | -0.775028 | 7.418451  |
| 21 | 6  | 0 | 2.427731  | 0.040157  | 8.319248  |
| 22 | 1  | 0 | 2.068044  | -0.009357 | 9.348915  |
| 23 | 1  | 0 | 2.450041  | 1.086724  | 8.008995  |
| 24 | 1  | 0 | 3.437404  | -0.370409 | 8.293442  |
| 25 | 8  | 0 | 0.170683  | -0.254565 | 7.372900  |
| 26 | 8  | 0 | 3.153825  | -1.258041 | 5.802584  |
| 27 | 1  | 0 | -0.188008 | -0.212337 | 8.267185  |
| 28 | 1  | 0 | 1.481394  | -1.820524 | 7.763191  |
| 29 | 47 | 0 | 4.177746  | -1.447501 | 3.555150  |

[Sep-Au]

## Input orientation:

| Center<br>Number | Atomic<br>Number | Atomic<br>Type | Coordinates (Angstroms) |           |           |
|------------------|------------------|----------------|-------------------------|-----------|-----------|
|                  |                  |                | X                       | Y         | Z         |
| 1                | 6                | 0              | -0.001717               | 0.093912  | 0.044894  |
| 2                | 6                | 0              | 0.013749                | -0.028520 | 2.309147  |
| 3                | 6                | 0              | 1.416549                | 0.033648  | 2.398374  |
| 4                | 6                | 0              | 2.186083                | 0.171230  | 1.186838  |
| 5                | 8                | 0              | 3.388173                | 0.243945  | 1.040688  |
| 6                | 6                | 0              | -0.067662               | 0.245656  | 4.721874  |
| 7                | 6                | 0              | 1.394430                | -0.184400 | 4.706841  |
| 8                | 7                | 0              | 2.056364                | -0.215491 | 3.591386  |
| 9                | 7                | 0              | -0.678429               | -0.166686 | 3.459030  |
| 10               | 7                | 0              | -0.695520               | -0.031352 | 1.153698  |
| 11               | 7                | 0              | 1.348590                | 0.220074  | 0.023625  |
| 12               | 7                | 0              | -0.669498               | 0.149428  | -1.140580 |
| 13               | 1                | 0              | -1.646090               | -0.095008 | -1.092525 |
| 14               | 1                | 0              | -0.189335               | -0.068008 | -1.998580 |
| 15               | 1                | 0              | 1.854021                | 0.349001  | -0.843178 |
| 16               | 1                | 0              | -1.683802               | -0.186722 | 3.375289  |
| 17               | 1                | 0              | -0.132633               | 1.334367  | 4.863025  |
| 18               | 1                | 0              | -0.615399               | -0.212157 | 5.542633  |
| 19               | 6                | 0              | 2.126956                | -0.547285 | 5.954730  |
| 20               | 6                | 0              | 1.368124                | -0.491659 | 7.292874  |

|    |    |   |          |           |          |
|----|----|---|----------|-----------|----------|
| 21 | 6  | 0 | 2.284951 | -0.734880 | 8.481006 |
| 22 | 1  | 0 | 1.707120 | -0.718042 | 9.410771 |
| 23 | 1  | 0 | 3.053858 | 0.037765  | 8.526438 |
| 24 | 1  | 0 | 2.779383 | -1.703372 | 8.398297 |
| 25 | 8  | 0 | 0.737231 | 0.794043  | 7.355121 |
| 26 | 8  | 0 | 3.286862 | -0.913768 | 5.938407 |
| 27 | 1  | 0 | 0.298214 | 0.865641  | 8.208518 |
| 28 | 1  | 0 | 0.598355 | -1.282528 | 7.258690 |
| 29 | 79 | 0 | 3.975456 | -1.907704 | 3.361492 |

[Sep-Au]<sup>+1</sup>

Input orientation:

| Center<br>Number | Atomic<br>Number | Atomic<br>Type | Coordinates (Angstroms) |           |           |
|------------------|------------------|----------------|-------------------------|-----------|-----------|
|                  |                  |                | X                       | Y         | Z         |
| 1                | 6                | 0              | 0.029094                | 0.081751  | 0.012665  |
| 2                | 6                | 0              | -0.066180               | 0.063425  | 2.283252  |
| 3                | 6                | 0              | 1.338210                | -0.085521 | 2.393649  |
| 4                | 6                | 0              | 2.133388                | -0.209492 | 1.210452  |
| 5                | 8                | 0              | 3.347330                | -0.424998 | 1.141669  |
| 6                | 6                | 0              | -0.167545               | 0.254640  | 4.749581  |
| 7                | 6                | 0              | 1.273153                | -0.237980 | 4.723878  |
| 8                | 7                | 0              | 1.907576                | -0.315112 | 3.603417  |
| 9                | 7                | 0              | -0.775076               | 0.072935  | 3.418596  |
| 10               | 7                | 0              | -0.709631               | 0.139318  | 1.108121  |
| 11               | 7                | 0              | 1.391125                | -0.075116 | 0.028784  |
| 12               | 7                | 0              | -0.578451               | 0.181100  | -1.176485 |
| 13               | 1                | 0              | -1.579497               | 0.300926  | -1.182794 |
| 14               | 1                | 0              | -0.085260               | 0.158728  | -2.053607 |
| 15               | 1                | 0              | 1.924716                | -0.144191 | -0.829384 |
| 16               | 1                | 0              | -1.778074               | 0.161434  | 3.327904  |
| 17               | 1                | 0              | -0.189798               | 1.308092  | 5.048839  |
| 18               | 1                | 0              | -0.758885               | -0.291502 | 5.482556  |
| 19               | 6                | 0              | 2.071396                | -0.616719 | 5.943929  |
| 20               | 6                | 0              | 1.407679                | -0.582993 | 7.320874  |
| 21               | 6                | 0              | 2.413605                | -0.648572 | 8.460618  |
| 22               | 1                | 0              | 1.884412                | -0.666421 | 9.416874  |
| 23               | 1                | 0              | 3.070297                | 0.222516  | 8.438249  |
| 24               | 1                | 0              | 3.024177                | -1.549201 | 8.393051  |
| 25               | 8                | 0              | 0.615536                | 0.602219  | 7.350857  |
| 26               | 8                | 0              | 3.234188                | -0.981271 | 5.846413  |
| 27               | 1                | 0              | 0.230342                | 0.691324  | 8.229038  |
| 28               | 1                | 0              | 0.758146                | -1.476180 | 7.354608  |
| 29               | 79               | 0              | 4.128413                | -0.882008 | 3.483220  |

[Sep-Au]<sup>+2</sup>

Input orientation:

| Center<br>Number | Atomic<br>Number | Atomic<br>Type | Coordinates (Angstroms) |           |          |
|------------------|------------------|----------------|-------------------------|-----------|----------|
|                  |                  |                | X                       | Y         | Z        |
| 1                | 6                | 0              | 0.099446                | 0.293774  | 0.022617 |
| 2                | 6                | 0              | -0.064336               | 0.198217  | 2.297446 |
| 3                | 6                | 0              | 1.279554                | -0.328772 | 2.420115 |



|    |    |   |           |           |           |
|----|----|---|-----------|-----------|-----------|
| 4  | 6  | 0 | 2.064973  | -0.549878 | 1.190971  |
| 5  | 8  | 0 | 3.200178  | -0.989885 | 1.173805  |
| 6  | 6  | 0 | -0.197739 | 0.070323  | 4.770197  |
| 7  | 6  | 0 | 1.201285  | -0.459730 | 4.729814  |
| 8  | 7  | 0 | 1.836118  | -0.622512 | 3.597390  |
| 9  | 7  | 0 | -0.725510 | 0.373961  | 3.440164  |
| 10 | 7  | 0 | -0.614525 | 0.493385  | 1.134497  |
| 11 | 7  | 0 | 1.386567  | -0.208009 | 0.030927  |
| 12 | 7  | 0 | -0.454326 | 0.590736  | -1.138139 |
| 13 | 1  | 0 | -1.398814 | 0.957713  | -1.136603 |
| 14 | 1  | 0 | 0.008192  | 0.473440  | -2.029806 |
| 15 | 1  | 0 | 1.898956  | -0.348615 | -0.836074 |
| 16 | 1  | 0 | -1.670573 | 0.743885  | 3.376345  |
| 17 | 1  | 0 | -0.238933 | 0.963431  | 5.407109  |
| 18 | 1  | 0 | -0.850286 | -0.649192 | 5.282373  |
| 19 | 6  | 0 | 2.031843  | -0.869533 | 5.970556  |
| 20 | 6  | 0 | 1.503858  | -0.784851 | 7.392572  |
| 21 | 6  | 0 | 2.440628  | 0.053279  | 8.274863  |
| 22 | 1  | 0 | 2.085639  | 0.014707  | 9.306605  |
| 23 | 1  | 0 | 2.451855  | 1.095348  | 7.949603  |
| 24 | 1  | 0 | 3.453712  | -0.348916 | 8.249860  |
| 25 | 8  | 0 | 0.179223  | -0.281786 | 7.350402  |
| 26 | 8  | 0 | 3.158144  | -1.288088 | 5.782881  |
| 27 | 1  | 0 | -0.176069 | -0.239492 | 8.246270  |
| 28 | 1  | 0 | 1.512944  | -1.826347 | 7.748625  |
| 29 | 79 | 0 | 4.092379  | -1.475465 | 3.523441  |

[Sep-Zn]

Input orientation:

| Center<br>Number | Atomic<br>Number | Atomic<br>Type | Coordinates (Angstroms) |           |           |
|------------------|------------------|----------------|-------------------------|-----------|-----------|
|                  |                  |                | X                       | Y         | Z         |
| 1                | 6                | 0              | -0.059507               | 0.214509  | 0.083492  |
| 2                | 6                | 0              | -0.069090               | 0.033616  | 2.342751  |
| 3                | 6                | 0              | 1.330887                | 0.113116  | 2.456465  |
| 4                | 6                | 0              | 2.117744                | 0.295903  | 1.259866  |
| 5                | 8                | 0              | 3.317203                | 0.398131  | 1.124088  |
| 6                | 6                | 0              | -0.187638               | 0.225380  | 4.764079  |
| 7                | 6                | 0              | 1.277049                | -0.206115 | 4.737716  |
| 8                | 7                | 0              | 1.957636                | -0.176235 | 3.644862  |
| 9                | 7                | 0              | -0.777668               | -0.146719 | 3.478120  |
| 10               | 7                | 0              | -0.765821               | 0.039800  | 1.175851  |
| 11               | 7                | 0              | 1.287352                | 0.372401  | 0.085733  |
| 12               | 7                | 0              | -0.711632               | 0.292917  | -1.113352 |
| 13               | 1                | 0              | -1.680947               | 0.017888  | -1.083254 |
| 14               | 1                | 0              | -0.213323               | 0.085461  | -1.963708 |
| 15               | 1                | 0              | 1.799900                | 0.542772  | -0.769472 |
| 16               | 1                | 0              | -1.780728               | -0.183663 | 3.377042  |
| 17               | 1                | 0              | -0.254048               | 1.308106  | 4.941902  |
| 18               | 1                | 0              | -0.745920               | -0.264267 | 5.560479  |
| 19               | 6                | 0              | 2.002162                | -0.664733 | 5.971810  |
| 20               | 6                | 0              | 1.320994                | -0.453566 | 7.338365  |
| 21               | 6                | 0              | 2.292821                | -0.637352 | 8.493759  |
| 22               | 1                | 0              | 1.770391                | -0.535632 | 9.450386  |
| 23               | 1                | 0              | 3.082245                | 0.114408  | 8.440251  |

|    |    |   |          |           |          |
|----|----|---|----------|-----------|----------|
| 24 | 1  | 0 | 2.757853 | -1.622700 | 8.452367 |
| 25 | 8  | 0 | 0.743065 | 0.857355  | 7.325747 |
| 26 | 8  | 0 | 3.081441 | -1.209677 | 5.913771 |
| 27 | 1  | 0 | 0.325555 | 1.004219  | 8.179979 |
| 28 | 1  | 0 | 0.521422 | -1.211641 | 7.411732 |
| 29 | 30 | 0 | 5.754988 | -3.552551 | 2.448000 |

[Sep-Zn]<sup>+1</sup>

Input orientation:

| Center<br>Number | Atomic<br>Number | Atomic<br>Type | Coordinates (Angstroms) |           |           |
|------------------|------------------|----------------|-------------------------|-----------|-----------|
|                  |                  |                | X                       | Y         | Z         |
| 1                | 6                | 0              | 0.067140                | 0.116907  | 0.009789  |
| 2                | 6                | 0              | -0.094283               | 0.082730  | 2.278240  |
| 3                | 6                | 0              | 1.295704                | -0.128464 | 2.414781  |
| 4                | 6                | 0              | 2.119488                | -0.271518 | 1.260409  |
| 5                | 8                | 0              | 3.323592                | -0.536833 | 1.269004  |
| 6                | 6                | 0              | -0.224028               | 0.245132  | 4.745605  |
| 7                | 6                | 0              | 1.197310                | -0.299631 | 4.734076  |
| 8                | 7                | 0              | 1.853919                | -0.396299 | 3.622231  |
| 9                | 7                | 0              | -0.821627               | 0.110896  | 3.401452  |
| 10               | 7                | 0              | -0.700338               | 0.194347  | 1.085328  |
| 11               | 7                | 0              | 1.424070                | -0.088926 | 0.057194  |
| 12               | 7                | 0              | -0.505937               | 0.243626  | -1.194094 |
| 13               | 1                | 0              | -1.501500               | 0.399397  | -1.225324 |
| 14               | 1                | 0              | 0.010134                | 0.216830  | -2.057772 |
| 15               | 1                | 0              | 1.975138                | -0.174722 | -0.788336 |
| 16               | 1                | 0              | -1.819647               | 0.235423  | 3.300286  |
| 17               | 1                | 0              | -0.212196               | 1.293913  | 5.062436  |
| 18               | 1                | 0              | -0.844836               | -0.289691 | 5.462029  |
| 19               | 6                | 0              | 2.006392                | -0.706853 | 5.932355  |
| 20               | 6                | 0              | 1.429029                | -0.628132 | 7.340563  |
| 21               | 6                | 0              | 2.511940                | -0.523361 | 8.407175  |
| 22               | 1                | 0              | 2.056864                | -0.549853 | 9.400351  |
| 23               | 1                | 0              | 3.060831                | 0.413895  | 8.298200  |
| 24               | 1                | 0              | 3.213830                | -1.353417 | 8.329148  |
| 25               | 8                | 0              | 0.525922                | 0.474044  | 7.360382  |
| 26               | 8                | 0              | 3.141736                | -1.132643 | 5.757093  |
| 27               | 1                | 0              | 0.176504                | 0.570188  | 8.252444  |
| 28               | 1                | 0              | 0.876687                | -1.575057 | 7.476203  |
| 29               | 30               | 0              | 3.952544                | -0.890799 | 3.537575  |

[Sep-Zn]<sup>+2</sup>

Input orientation:

| Center<br>Number | Atomic<br>Number | Atomic<br>Type | Coordinates (Angstroms) |           |          |
|------------------|------------------|----------------|-------------------------|-----------|----------|
|                  |                  |                | X                       | Y         | Z        |
| 1                | 6                | 0              | 0.193716                | 0.246612  | 0.039976 |
| 2                | 6                | 0              | -0.156579               | 0.263627  | 2.294552 |
| 3                | 6                | 0              | 1.114888                | -0.335373 | 2.461742 |
| 4                | 6                | 0              | 1.975369                | -0.645178 | 1.388692 |
| 5                | 8                | 0              | 3.125730                | -1.162468 | 1.570814 |
| 6                | 6                | 0              | -0.379243               | 0.198139  | 4.818760 |

|    |    |   |           |           |           |
|----|----|---|-----------|-----------|-----------|
| 7  | 6  | 0 | 1.022528  | -0.405284 | 4.807495  |
| 8  | 7  | 0 | 1.594824  | -0.606140 | 3.668150  |
| 9  | 7  | 0 | -0.832120 | 0.515526  | 3.415627  |
| 10 | 7  | 0 | -0.598299 | 0.546037  | 1.069259  |
| 11 | 7  | 0 | 1.465619  | -0.336720 | 0.158814  |
| 12 | 7  | 0 | -0.232191 | 0.512726  | -1.185419 |
| 13 | 1  | 0 | -1.147238 | 0.933910  | -1.286820 |
| 14 | 1  | 0 | 0.297621  | 0.319045  | -2.023237 |
| 15 | 1  | 0 | 2.030248  | -0.534700 | -0.661822 |
| 16 | 1  | 0 | -1.744107 | 0.950428  | 3.324206  |
| 17 | 1  | 0 | -0.399714 | 1.113483  | 5.410657  |
| 18 | 1  | 0 | -1.088045 | -0.495519 | 5.273583  |
| 19 | 6  | 0 | 1.955087  | -0.864202 | 5.891416  |
| 20 | 6  | 0 | 1.607093  | -0.798247 | 7.351750  |
| 21 | 6  | 0 | 2.633984  | 0.036011  | 8.136998  |
| 22 | 1  | 0 | 2.373400  | 0.007920  | 9.196677  |
| 23 | 1  | 0 | 2.621511  | 1.075711  | 7.804967  |
| 24 | 1  | 0 | 3.636822  | -0.376700 | 8.022946  |
| 25 | 8  | 0 | 0.290569  | -0.285558 | 7.418889  |
| 26 | 8  | 0 | 3.074434  | -1.334303 | 5.557937  |
| 27 | 1  | 0 | -0.002576 | -0.256769 | 8.337055  |
| 28 | 1  | 0 | 1.650685  | -1.840810 | 7.705591  |
| 29 | 30 | 0 | 3.410367  | -1.390072 | 3.559573  |

[Sep-Cd]

Input orientation:

| Center<br>Number | Atomic<br>Number | Atomic<br>Type | Coordinates (Angstroms) |           |           |
|------------------|------------------|----------------|-------------------------|-----------|-----------|
|                  |                  |                | X                       | Y         | Z         |
| 1                | 6                | 0              | -0.008685               | 0.106111  | 0.044331  |
| 2                | 6                | 0              | -0.012570               | 0.030930  | 2.310611  |
| 3                | 6                | 0              | 1.390870                | 0.090017  | 2.409986  |
| 4                | 6                | 0              | 2.172730                | 0.171104  | 1.201472  |
| 5                | 8                | 0              | 3.377944                | 0.200130  | 1.061580  |
| 6                | 6                | 0              | -0.115192               | 0.281211  | 4.737381  |
| 7                | 6                | 0              | 1.357098                | -0.122236 | 4.710388  |
| 8                | 7                | 0              | 2.024740                | -0.135304 | 3.605115  |
| 9                | 7                | 0              | -0.714488               | -0.092119 | 3.455171  |
| 10               | 7                | 0              | -0.713399               | 0.007520  | 1.148907  |
| 11               | 7                | 0              | 1.343681                | 0.213335  | 0.029949  |
| 12               | 7                | 0              | -0.666672               | 0.147857  | -1.147794 |
| 13               | 1                | 0              | -1.645967               | -0.085981 | -1.103078 |
| 14               | 1                | 0              | -0.182004               | -0.090837 | -1.997545 |
| 15               | 1                | 0              | 1.857075                | 0.307750  | -0.836587 |
| 16               | 1                | 0              | -1.718693               | -0.125651 | 3.363236  |
| 17               | 1                | 0              | -0.199695               | 1.362057  | 4.919868  |
| 18               | 1                | 0              | -0.660614               | -0.216067 | 5.537354  |
| 19               | 6                | 0              | 2.111487                | -0.499551 | 5.946359  |
| 20               | 6                | 0              | 1.363815                | -0.496559 | 7.292594  |
| 21               | 6                | 0              | 2.297917                | -0.733347 | 8.468362  |
| 22               | 1                | 0              | 1.728914                | -0.757155 | 9.403438  |
| 23               | 1                | 0              | 3.039776                | 0.064770  | 8.524219  |
| 24               | 1                | 0              | 2.825545                | -1.681551 | 8.359517  |
| 25               | 8                | 0              | 0.691432                | 0.766192  | 7.386072  |
| 26               | 8                | 0              | 3.278134                | -0.836659 | 5.903761  |

|    |    |   |          |           |          |
|----|----|---|----------|-----------|----------|
| 27 | 1  | 0 | 0.248926 | 0.801928  | 8.239796 |
| 28 | 1  | 0 | 0.619696 | -1.311206 | 7.247028 |
| 29 | 48 | 0 | 4.402582 | -2.315560 | 3.307335 |

[Sep-Cd]<sup>+1</sup>

Input orientation:

| Center<br>Number | Atomic<br>Number | Atomic<br>Type | Coordinates (Angstroms) |           |           |
|------------------|------------------|----------------|-------------------------|-----------|-----------|
|                  |                  |                | X                       | Y         | Z         |
| 1                | 6                | 0              | 3.939482                | 0.867401  | -0.040340 |
| 2                | 6                | 0              | 1.805006                | 1.650424  | -0.061465 |
| 3                | 6                | 0              | 1.273100                | 0.348710  | 0.097837  |
| 4                | 6                | 0              | 2.149251                | -0.773716 | 0.137694  |
| 5                | 8                | 0              | 1.813570                | -1.963356 | 0.183067  |
| 6                | 6                | 0              | -0.500110               | 2.525220  | 0.120189  |
| 7                | 6                | 0              | -0.930702               | 1.073566  | -0.045477 |
| 8                | 7                | 0              | -0.063258               | 0.116249  | 0.005404  |
| 9                | 7                | 0              | 0.933521                | 2.656459  | -0.199401 |
| 10               | 7                | 0              | 3.122104                | 1.902136  | -0.137177 |
| 11               | 7                | 0              | 3.506225                | -0.426846 | 0.105733  |
| 12               | 7                | 0              | 5.260167                | 1.085944  | -0.088912 |
| 13               | 1                | 0              | 5.574082                | 2.038520  | -0.190895 |
| 14               | 1                | 0              | 5.945581                | 0.354026  | -0.002790 |
| 15               | 1                | 0              | 4.157765                | -1.201536 | 0.142567  |
| 16               | 1                | 0              | 1.318749                | 3.581054  | -0.335971 |
| 17               | 1                | 0              | -0.703227               | 2.852532  | 1.145795  |
| 18               | 1                | 0              | -1.067912               | 3.183812  | -0.535008 |
| 19               | 6                | 0              | -2.347839               | 0.607691  | -0.229094 |
| 20               | 6                | 0              | -3.492294               | 1.616244  | -0.289772 |
| 21               | 6                | 0              | -4.851424               | 0.975170  | -0.046162 |
| 22               | 1                | 0              | -5.638815               | 1.724567  | -0.160010 |
| 23               | 1                | 0              | -4.901052               | 0.564855  | 0.963912  |
| 24               | 1                | 0              | -5.037591               | 0.172613  | -0.759882 |
| 25               | 8                | 0              | -3.185075               | 2.636066  | 0.658223  |
| 26               | 8                | 0              | -2.579236               | -0.586895 | -0.360887 |
| 27               | 1                | 0              | -3.911046               | 3.268493  | 0.674693  |
| 28               | 1                | 0              | -3.462322               | 2.027922  | -1.314757 |
| 29               | 48               | 0              | -0.671762               | -2.290490 | 0.019495  |

[Sep-Cd]<sup>+2</sup>

Input orientation:

| Center<br>Number | Atomic<br>Number | Atomic<br>Type | Coordinates (Angstroms) |           |          |
|------------------|------------------|----------------|-------------------------|-----------|----------|
|                  |                  |                | X                       | Y         | Z        |
| 1                | 6                | 0              | 0.159633                | 0.308273  | 0.054775 |
| 2                | 6                | 0              | -0.087371               | 0.247026  | 2.319844 |
| 3                | 6                | 0              | 1.176145                | -0.396848 | 2.442338 |
| 4                | 6                | 0              | 1.977794                | -0.668359 | 1.308374 |
| 5                | 8                | 0              | 3.129731                | -1.194519 | 1.356384 |
| 6                | 6                | 0              | -0.299141               | 0.098210  | 4.821811 |
| 7                | 6                | 0              | 1.112442                | -0.479225 | 4.785238 |
| 8                | 7                | 0              | 1.689309                | -0.683883 | 3.644894 |
| 9                | 7                | 0              | -0.735485               | 0.505658  | 3.452897 |

|    |    |   |           |           |           |
|----|----|---|-----------|-----------|-----------|
| 10 | 7  | 0 | -0.573355 | 0.588830  | 1.126842  |
| 11 | 7  | 0 | 1.411577  | -0.302963 | 0.111677  |
| 12 | 7  | 0 | -0.312689 | 0.624402  | -1.143408 |
| 13 | 1  | 0 | -1.220565 | 1.068618  | -1.191485 |
| 14 | 1  | 0 | 0.175738  | 0.443531  | -2.008200 |
| 15 | 1  | 0 | 1.946487  | -0.484340 | -0.731801 |
| 16 | 1  | 0 | -1.629365 | 0.978466  | 3.376639  |
| 17 | 1  | 0 | -0.344025 | 0.964835  | 5.480393  |
| 18 | 1  | 0 | -0.995256 | -0.641025 | 5.223720  |
| 19 | 6  | 0 | 1.993212  | -0.907592 | 5.924441  |
| 20 | 6  | 0 | 1.579150  | -0.806063 | 7.373999  |
| 21 | 6  | 0 | 2.493198  | 0.173727  | 8.132060  |
| 22 | 1  | 0 | 2.206749  | 0.177949  | 9.185626  |
| 23 | 1  | 0 | 2.384741  | 1.187579  | 7.741871  |
| 24 | 1  | 0 | 3.536176  | -0.137812 | 8.065645  |
| 25 | 8  | 0 | 0.216613  | -0.431997 | 7.399386  |
| 26 | 8  | 0 | 3.128009  | -1.373975 | 5.684922  |
| 27 | 1  | 0 | -0.101570 | -0.424908 | 8.309564  |
| 28 | 1  | 0 | 1.723642  | -1.816945 | 7.783154  |
| 29 | 48 | 0 | 3.752862  | -1.565522 | 3.497227  |

[Sep-Hg]

Input orientation:

| Center<br>Number | Atomic<br>Number | Atomic<br>Type | Coordinates (Angstroms) |           |           |
|------------------|------------------|----------------|-------------------------|-----------|-----------|
|                  |                  |                | X                       | Y         | Z         |
| 1                | 6                | 0              | -0.021727               | 0.133596  | 0.058108  |
| 2                | 6                | 0              | -0.044675               | -0.015815 | 2.319676  |
| 3                | 6                | 0              | 1.356654                | 0.052028  | 2.437075  |
| 4                | 6                | 0              | 2.149331                | 0.202859  | 1.240734  |
| 5                | 8                | 0              | 3.352721                | 0.280967  | 1.109954  |
| 6                | 6                | 0              | -0.168092               | 0.201251  | 4.739730  |
| 7                | 6                | 0              | 1.294031                | -0.239487 | 4.723132  |
| 8                | 7                | 0              | 1.975402                | -0.228022 | 3.630115  |
| 9                | 7                | 0              | -0.757146               | -0.176435 | 3.454750  |
| 10               | 7                | 0              | -0.734997               | -0.016619 | 1.150015  |
| 11               | 7                | 0              | 1.328044                | 0.270834  | 0.063242  |
| 12               | 7                | 0              | -0.667239               | 0.203442  | -1.141498 |
| 13               | 1                | 0              | -1.641006               | -0.055509 | -1.112880 |
| 14               | 1                | 0              | -0.168628               | -0.017805 | -1.988152 |
| 15               | 1                | 0              | 1.845719                | 0.421427  | -0.792625 |
| 16               | 1                | 0              | -1.760284               | -0.209865 | 3.352640  |
| 17               | 1                | 0              | -0.227878               | 1.285817  | 4.907237  |
| 18               | 1                | 0              | -0.732338               | -0.276741 | 5.538604  |
| 19               | 6                | 0              | 2.015702                | -0.687305 | 5.962147  |
| 20               | 6                | 0              | 1.328746                | -0.480269 | 7.325177  |
| 21               | 6                | 0              | 2.299929                | -0.646396 | 8.484092  |
| 22               | 1                | 0              | 1.771827                | -0.550883 | 9.438189  |
| 23               | 1                | 0              | 3.077972                | 0.117284  | 8.432344  |
| 24               | 1                | 0              | 2.779597                | -1.624672 | 8.447288  |
| 25               | 8                | 0              | 0.730620                | 0.820804  | 7.306027  |
| 26               | 8                | 0              | 3.100845                | -1.223192 | 5.911659  |
| 27               | 1                | 0              | 0.333402                | 0.976731  | 8.168189  |
| 28               | 1                | 0              | 0.540922                | -1.250910 | 7.398284  |
| 29               | 80               | 0              | 5.136930                | -2.215988 | 2.965573  |

-----  
[Sep-Hg]<sup>+1</sup>

Input orientation:

| Center<br>Number | Atomic<br>Number | Atomic<br>Type | Coordinates (Angstroms) |           |           |
|------------------|------------------|----------------|-------------------------|-----------|-----------|
|                  |                  |                | X                       | Y         | Z         |
| 1                | 6                | 0              | 0.009169                | 0.077213  | 0.019781  |
| 2                | 6                | 0              | -0.071457               | 0.046138  | 2.290565  |
| 3                | 6                | 0              | 1.337020                | -0.078101 | 2.399228  |
| 4                | 6                | 0              | 2.125365                | -0.169929 | 1.210869  |
| 5                | 8                | 0              | 3.343286                | -0.353984 | 1.133738  |
| 6                | 6                | 0              | -0.163684               | 0.252259  | 4.747725  |
| 7                | 6                | 0              | 1.276191                | -0.244557 | 4.718321  |
| 8                | 7                | 0              | 1.922447                | -0.317300 | 3.603033  |
| 9                | 7                | 0              | -0.778608               | 0.039410  | 3.427259  |
| 10               | 7                | 0              | -0.724123               | 0.110726  | 1.118697  |
| 11               | 7                | 0              | 1.374165                | -0.040809 | 0.031323  |
| 12               | 7                | 0              | -0.606516               | 0.162429  | -1.167281 |
| 13               | 1                | 0              | -1.610290               | 0.255045  | -1.169319 |
| 14               | 1                | 0              | -0.115774               | 0.159480  | -2.045865 |
| 15               | 1                | 0              | 1.907653                | -0.089533 | -0.828217 |
| 16               | 1                | 0              | -1.783196               | 0.109231  | 3.339324  |
| 17               | 1                | 0              | -0.180571               | 1.312715  | 5.023169  |
| 18               | 1                | 0              | -0.750940               | -0.275291 | 5.497388  |
| 19               | 6                | 0              | 2.058045                | -0.631827 | 5.942762  |
| 20               | 6                | 0              | 1.387457                | -0.563382 | 7.316771  |
| 21               | 6                | 0              | 2.381707                | -0.680263 | 8.461878  |
| 22               | 1                | 0              | 1.848373                | -0.670930 | 9.416034  |
| 23               | 1                | 0              | 3.082686                | 0.155703  | 8.442839  |
| 24               | 1                | 0              | 2.946125                | -1.610803 | 8.396452  |
| 25               | 8                | 0              | 0.661242                | 0.664254  | 7.338686  |
| 26               | 8                | 0              | 3.210958                | -1.023182 | 5.846425  |
| 27               | 1                | 0              | 0.269337                | 0.773540  | 8.211602  |
| 28               | 1                | 0              | 0.689633                | -1.419398 | 7.349317  |
| 29               | 80               | 0              | 4.448684                | -0.897725 | 3.456321  |

-----  
[Sep-Hg]<sup>+2</sup>

Input orientation:

| Center<br>Number | Atomic<br>Number | Atomic<br>Type | Coordinates (Angstroms) |           |           |
|------------------|------------------|----------------|-------------------------|-----------|-----------|
|                  |                  |                | X                       | Y         | Z         |
| 1                | 6                | 0              | 0.081290                | 0.162530  | 0.003616  |
| 2                | 6                | 0              | -0.121483               | 0.155962  | 2.272953  |
| 3                | 6                | 0              | 1.270698                | -0.134498 | 2.414706  |
| 4                | 6                | 0              | 2.081296                | -0.346702 | 1.266782  |
| 5                | 8                | 0              | 3.291552                | -0.701299 | 1.282049  |
| 6                | 6                | 0              | -0.263721               | 0.240342  | 4.772414  |
| 7                | 6                | 0              | 1.157485                | -0.315741 | 4.753573  |
| 8                | 7                | 0              | 1.778631                | -0.401694 | 3.624854  |
| 9                | 7                | 0              | -0.829313               | 0.240011  | 3.396864  |
| 10               | 7                | 0              | -0.688312               | 0.300193  | 1.077334  |
| 11               | 7                | 0              | 1.431782                | -0.160051 | 0.067837  |
| 12               | 7                | 0              | -0.455081               | 0.336263  | -1.196300 |

|    |    |   |           |           |           |
|----|----|---|-----------|-----------|-----------|
| 13 | 1  | 0 | -1.437941 | 0.571810  | -1.245681 |
| 14 | 1  | 0 | 0.059833  | 0.256163  | -2.061036 |
| 15 | 1  | 0 | 1.982125  | -0.287348 | -0.775600 |
| 16 | 1  | 0 | -1.822035 | 0.424294  | 3.302911  |
| 17 | 1  | 0 | -0.263699 | 1.254974  | 5.179305  |
| 18 | 1  | 0 | -0.904849 | -0.359266 | 5.415496  |
| 19 | 6  | 0 | 1.995702  | -0.754541 | 5.927021  |
| 20 | 6  | 0 | 1.470819  | -0.707490 | 7.355912  |
| 21 | 6  | 0 | 2.552498  | -0.333119 | 8.370461  |
| 22 | 1  | 0 | 2.132682  | -0.395380 | 9.376582  |
| 23 | 1  | 0 | 2.898753  | 0.688088  | 8.200733  |
| 24 | 1  | 0 | 3.397628  | -1.018831 | 8.316049  |
| 25 | 8  | 0 | 0.365988  | 0.172679  | 7.362862  |
| 26 | 8  | 0 | 3.142281  | -1.196634 | 5.753267  |
| 27 | 1  | 0 | 0.064009  | 0.303987  | 8.269385  |
| 28 | 1  | 0 | 1.146452  | -1.747800 | 7.544645  |
| 29 | 80 | 0 | 3.979313  | -1.195772 | 3.499833  |

---
